# Supplementary material
Source: publisher site journal article supplement (http://static.cambridge.org/content/id/urn:cambridge.org:id:article:S0016756819000244/resource/name/S0016756819000244supp002.xlsx)
Supplement: Supplementary file 1 [file S0016756819000244supp002.xlsx]

## Sheet: Sample List
No.	GPS		Depth(m)
	E	N
1	109°30'	34°45'	23.46-25.19
2	109°30'	34°45'	143.54-146.16
3	109°30'	34°45'	172.52-174.34
4	109°30'	34°45'	262.35-267.5
5	109°30'	34°45'	401.02-402.29
6	109°30'	34°45'	431.22-432.3
7	109°30'	34°45'	544.47-546.76

## Sheet: Sample1
Analysis	Ratios								Ages								Discordance (%)	Best Age (Ma)
	207Pb/235U		206Pb/238U		208Pb/232Th		207Pb/206Pb		207Pb/235U		206Pb/238U		208Pb/232Th		207Pb/206Pb
		2 s.e.		2 s.e.		2 s.e.		2 s.e.		2 s.e.		2 s.e.		2 s.e.		2 s.e.			2 s.e.
LYH22-20	0.164	0.044	0.0235	0.0011	0.0078	0.0013	0.05	0.013	149	38	149.4	6.7	157	26	110	430	0.3	149.4	6.7
LYH22-52	0.272	0.063	0.0342	0.0021	0.0114	0.0022	0.056	0.014	216	48	216	13	227	43	130	390	0	216	13
LYH22-66	0.236	0.032	0.0343	0.0014	0.0116	0.0017	0.048	0.0067	214	26	217.5	8.4	232	33	210	250	1.6	217.5	8.4
LYH22-6	0.269	0.016	0.03779	0.00059	0.01198	0.00044	0.0518	0.003	242	12	239.1	3.7	240.5	8.7	280	110	1.2	239.1	3.7
LYH22-116	0.263	0.029	0.0381	0.0013	0.012	0.0014	0.0482	0.0057	240	23	240.9	7.9	240	28	160	220	0.4	240.9	7.9
LYH22-13	0.278	0.015	0.03963	0.00048	0.0125	0.0005	0.0512	0.0026	249	12	250.5	3	251	10	211	98	0.6	250.5	3
LYH22-23	0.292	0.026	0.04039	0.00094	0.01273	0.00094	0.0508	0.0046	252	20	255.7	5.9	255	19	160	160	1.4	255.7	5.9
LYH22-49	0.291	0.033	0.0424	0.0015	0.014	0.001	0.0506	0.006	266	26	267.5	9.4	281	20	270	210	0.6	267.5	9.4
LYH22-113	0.323	0.035	0.0429	0.0014	0.01563	0.00096	0.0543	0.0059	274	27	270.8	8.5	313	19	300	200	1.2	270.8	8.5
LYH22-17	0.309	0.022	0.04301	0.00076	0.01347	0.00067	0.0519	0.0036	272	17	272	4.6	270	13	250	130	0	272	4.6
LYH22-15	0.328	0.068	0.0433	0.0017	0.0124	0.0016	0.053	0.011	275	51	273	10	250	33	230	370	0.7	273	10
LYH22-90	0.316	0.026	0.0444	0.0011	0.0143	0.001	0.0539	0.0046	277	21	280.1	6.7	287	20	270	160	1.1	280.1	6.7
LYH22-11	0.321	0.018	0.04452	0.00065	0.01396	0.00067	0.0532	0.0029	284	13	280.7	4	280	13	300	100	1.2	280.7	4
LYH22-102	0.324	0.039	0.0449	0.0017	0.0133	0.0016	0.0533	0.0066	285	30	283	10	266	32	270	220	0.7	283	10
LYH22-43	0.326	0.051	0.0451	0.0017	0.0149	0.0015	0.0539	0.0083	285	37	284	10	299	31	350	290	0.4	284	10
LYH22-63	0.329	0.039	0.0454	0.0012	0.01597	0.00092	0.0533	0.0063	287	30	286.2	7.5	320	18	240	210	0.3	286.2	7.5
LYH22-72	0.333	0.019	0.04577	0.00068	0.01446	0.00087	0.0532	0.0032	292	15	288.5	4.2	290	17	320	110	1.2	288.5	4.2
LYH22-108	0.325	0.028	0.0462	0.0015	0.0148	0.0038	0.0532	0.005	291	22	291.1	9.3	294	75	320	180	0	291.1	9.3
LYH22-78	0.345	0.033	0.0469	0.0012	0.0158	0.0013	0.0526	0.0052	291	25	295.3	7.4	317	25	200	170	1.5	295.3	7.4
LYH22-22	0.336	0.019	0.04748	0.00063	0.01588	0.00066	0.0519	0.0028	299	15	299.4	3.9	318	13	240	100	0.1	299.4	3.9
LYH22-120	0.375	0.04	0.0495	0.0017	0.0175	0.0018	0.0558	0.0063	308	29	311	10	349	36	260	200	1	311	10
LYH22-14	0.368	0.03	0.0495	0.0011	0.01631	0.00083	0.0546	0.0047	310	22	311.1	6.9	327	17	250	150	0.4	311.1	6.9
LYH22-33	0.381	0.028	0.0523	0.001	0.0194	0.0014	0.0544	0.0042	327	21	329.3	6.3	391	27	340	150	0.7	329.3	6.3
LYH22-100	0.399	0.033	0.0532	0.0014	0.0162	0.0013	0.0549	0.0046	336	24	334.2	8.4	325	25	330	170	0.5	334.2	8.4
LYH22-107	0.394	0.067	0.0535	0.0041	0.018	0.0037	0.0527	0.0092	331	50	335	25	360	74	260	350	1.2	335	25
LYH22-86	0.424	0.031	0.0562	0.0011	0.0189	0.0013	0.0559	0.0042	350	22	353.4	6.7	379	26	350	150	1	353.4	6.7
LYH22-109	0.45	0.048	0.0621	0.0025	0.0185	0.0021	0.0536	0.0058	386	30	388	15	369	41	430	190	0.5	388	15
LYH22-54	0.482	0.032	0.0634	0.0012	0.0208	0.0013	0.0555	0.0039	394	22	397	7.3	416	25	360	140	0.8	397	7.3
LYH22-112	0.49	0.045	0.0643	0.002	0.0182	0.0017	0.0567	0.005	399	31	402	12	364	33	400	180	0.7	402	12
LYH22-91	0.512	0.031	0.0676	0.0017	0.0221	0.002	0.0548	0.0037	420	20	422	10	441	39	360	140	0.5	422	10
LYH22-83	0.509	0.026	0.06786	0.00091	0.02181	0.0007	0.0531	0.0026	420	18	423.2	5.5	436	14	340	100	0.8	423.2	5.5
LYH22-32	0.527	0.049	0.068	0.002	0.0215	0.002	0.0556	0.0041	427	33	424	12	429	40	450	140	0.7	424	12
LYH22-70	0.521	0.029	0.0687	0.0012	0.0217	0.001	0.0562	0.0033	425	19	428.2	7.2	433	20	420	120	0.7	428.2	7.2
LYH22-105	0.565	0.077	0.0706	0.0031	0.0239	0.0031	0.059	0.0084	444	52	439	18	476	62	420	260	1.1	439	18
LYH22-21	0.55	0.054	0.0711	0.0016	0.0222	0.0021	0.0555	0.0054	443	36	442.6	9.3	443	42	410	190	0.1	442.6	9.3
LYH22-35	0.58	0.042	0.0721	0.0015	0.0221	0.0014	0.0594	0.0044	452	26	448.3	9.1	441	27	440	140	0.8	448.3	9.1
LYH22-29	0.561	0.032	0.07251	0.00084	0.02349	0.00085	0.0562	0.003	447	21	451.2	5	470	17	400	110	0.9	451.2	5
LYH22-103	0.564	0.038	0.0727	0.0019	0.0215	0.0013	0.0562	0.0041	451	25	452	12	430	26	410	140	0.2	452	12
LYH22-58	0.575	0.029	0.075	0.001	0.02372	0.0009	0.0564	0.0029	463	19	465.8	6	474	18	430	100	0.6	465.8	6
LYH22-51	0.608	0.098	0.075	0.0032	0.0231	0.0033	0.061	0.01	468	67	466	19	460	65	450	320	0.4	466	19
LYH22-84	0.586	0.047	0.0751	0.0022	0.0239	0.0014	0.0564	0.004	467	31	467	13	477	29	440	140	0	467	13
LYH22-96	0.595	0.025	0.0754	0.0011	0.02462	0.00092	0.0573	0.0026	470	16	468.5	6.8	491	18	468	94	0.3	468.5	6.8
LYH22-92	0.59	0.024	0.0758	0.0011	0.0261	0.001	0.0559	0.0023	471	16	470.6	6.4	520	20	412	87	0.1	470.6	6.4
LYH22-5	0.609	0.026	0.07705	0.00083	0.02352	0.00069	0.057	0.0022	481	16	478.4	5	470	14	445	81	0.5	478.4	5
LYH22-46	0.624	0.021	0.0791	0.00092	0.0242	0.0006	0.0579	0.0019	491	13	490.6	5.5	483	12	520	72	0.1	490.6	5.5
LYH22-69	0.645	0.028	0.0817	0.0018	0.0268	0.0013	0.058	0.0026	506	17	506	11	535	25	511	97	0	506	11
LYH22-40	0.678	0.078	0.0875	0.0054	0.0265	0.0039	0.0548	0.0096	538	55	540	32	527	76	510	330	0.4	540	32
LYH22-121	0.724	0.046	0.0896	0.0022	0.0321	0.0017	0.0584	0.0037	552	27	554	13	638	34	510	130	0.4	554	13
LYH22-2	0.832	0.034	0.0991	0.002	0.0343	0.0018	0.0604	0.0024	612	19	612	12	682	35	619	84	0	612	12
LYH22-16	1.008	0.078	0.113	0.0012	0.036	0.0021	0.0628	0.0045	690	39	691.1	6.7	713	41	590	150	0.2	691.1	6.7
LYH22-41	1.007	0.083	0.1159	0.0025	0.0505	0.0058	0.0636	0.0051	703	42	706	15	990	110	680	170	0.4	706	15
LYH22-77	1.128	0.077	0.125	0.0032	0.041	0.0022	0.0648	0.0042	758	36	759	18	811	42	740	140	0.1	759	18
LYH22-39	1.32	0.12	0.1404	0.0032	0.0406	0.0022	0.0685	0.0059	844	54	847	18	804	42	810	190	0.4	847	18
LYH22-9	1.409	0.075	0.1479	0.0021	0.0478	0.002	0.0688	0.0036	890	32	889	12	942	38	840	110	0.1	889	12
LYH22-88	1.441	0.048	0.1504	0.0022	0.0525	0.0041	0.0698	0.0024	904	21	903	12	1029	79	914	67	0.1	903	12
LYH22-42	1.452	0.094	0.1514	0.0027	0.0464	0.0026	0.0708	0.0046	911	40	908	15	916	51	890	130	0.3	908	15
LYH22-50	1.463	0.089	0.1521	0.0032	0.0581	0.0047	0.0717	0.0045	919	37	912	18	1137	90	960	130	0.8	912	18
LYH22-104	1.492	0.034	0.1544	0.0017	0.0531	0.0025	0.0701	0.0014	924	14	926.2	9.7	1043	48	916	41	0.2	926.2	9.7
LYH22-28	1.58	0.21	0.1609	0.004	0.0474	0.0046	0.0736	0.0092	961	83	962	22	934	89	920	250	0.1	962	22
LYH22-82	1.62	0.077	0.1617	0.0026	0.0502	0.002	0.0719	0.0035	968	30	966	14	989	38	930	110	0.2	966	14
LYH22-89	1.591	0.054	0.1621	0.0024	0.0509	0.0023	0.0701	0.0025	966	21	968	13	1003	44	916	76	0.2	968	13
LYH22-8	1.68	0.12	0.1661	0.0027	0.051	0.003	0.0736	0.005	987	46	990	15	1004	58	980	140	0.3	990	15
LYH22-48	1.893	0.051	0.1831	0.0019	0.0567	0.0013	0.0751	0.0023	1081	18	1084	11	1114	26	1077	60	0.3	1084	11
LYH22-25	1.93	0.26	0.1856	0.0043	0.0535	0.0053	0.077	0.01	1098	95	1097	23	1050	100	1000	260	0.1	1097	23
LYH22-73	2.137	0.099	0.1957	0.0028	0.0668	0.0032	0.0798	0.0034	1148	30	1152	15	1304	60	1135	80	0.3	1152	15
LYH22-74	2.145	0.058	0.1983	0.0023	0.0626	0.0018	0.0785	0.0019	1165	19	1166	12	1226	35	1166	47	0.1	1166	12
LYH22-34	2.45	0.3	0.2031	0.0077	0.061	0.0068	0.085	0.01	1191	88	1189	41	1190	130	1110	250	0.2	1189	41
LYH22-10	2.36	0.12	0.2081	0.0027	0.0634	0.0019	0.0822	0.0038	1223	36	1220	14	1241	36	1186	90	0.2	1220	14
LYH22-44	3.1	0.12	0.2482	0.004	0.0758	0.0029	0.0908	0.0033	1427	29	1428	21	1475	54	1439	65	0.1	1428	21
LYH22-67	3.08	0.11	0.2498	0.0043	0.0793	0.0043	0.0907	0.0038	1436	29	1437	22	1539	81	1458	80	0.1	1437	22
LYH22-53	3.16	0.21	0.2502	0.0073	0.0752	0.0092	0.0925	0.0055	1442	51	1439	38	1460	170	1460	120	0.2	1439	38
LYH22-99	3.37	0.11	0.2601	0.0058	0.0915	0.0088	0.0938	0.0026	1493	25	1490	30	1780	160	1491	54	0.2	1490	30
LYH22-75	3.5	0.19	0.266	0.0067	0.0792	0.0056	0.0941	0.005	1520	42	1519	34	1540	100	1480	100	0.1	1519	34
LYH22-12	3.65	0.37	0.2719	0.0066	0.0809	0.0053	0.094	0.0089	1550	84	1549	33	1584	97	1460	190	0.1	1549	33
LYH22-68	4.08	0.23	0.2924	0.0072	0.099	0.0079	0.1042	0.006	1653	44	1653	36	1900	150	1690	100	0	1653	36
LYH22-30	4.32	0.22	0.2996	0.0069	0.0976	0.0074	0.1048	0.0056	1689	45	1689	34	1880	140	1680	100	0	1689	34
LYH22-18	4.6	0.81	0.308	0.011	0.112	0.015	0.109	0.019	1730	150	1731	53	2130	280	1810	360	0.1	1731	53
LYH22-65	4.59	0.42	0.311	0.01	0.0994	0.0086	0.11	0.01	1754	72	1750	51	1930	150	1830	160	0.2	1750	51
LYH22-3	4.69	0.52	0.313	0.011	0.093	0.01	0.104	0.011	1752	93	1756	53	1800	190	1730	210	0.2	1756	53
LYH22-79	4.75	0.31	0.3195	0.0079	0.0969	0.0069	0.1118	0.0071	1783	55	1785	39	1870	130	1820	120	0.1	1785	39
LYH22-37	4.86	0.31	0.3215	0.0079	0.0889	0.0048	0.1107	0.007	1798	55	1799	39	1718	89	1820	110	0.1	1799	39
LYH22-36	4.89	0.3	0.3247	0.0082	0.0997	0.0068	0.1082	0.0061	1809	52	1811	40	1920	120	1760	100	0.1	1811	40
LYH22-111	5.17	0.49	0.329	0.02	0.101	0.011	0.116	0.012	1831	79	1832	98	1940	200	1820	200	0.1	1832	98
LYH22-26	5.43	0.3	0.333	0.003	0.0937	0.0039	0.1158	0.006	1849	47	1852	14	1810	72	1802	93	0.2	1852	14
LYH22-27	5.47	0.68	0.3332	0.0076	0.0892	0.0071	0.118	0.013	1850	110	1853	36	1720	130	1810	200	0.2	1853	36
LYH22-60	5.21	0.18	0.3342	0.006	0.0557	0.0034	0.1172	0.0034	1860	30	1861	28	1094	66	1898	53	0.1	1861	28
LYH22-106	5.3	0.23	0.336	0.015	0.105	0.011	0.1161	0.0063	1864	37	1862	72	2010	200	1917	96	0.1	1862	72
LYH22-76	5.31	0.22	0.3368	0.0082	0.0898	0.0049	0.1165	0.0048	1871	36	1869	40	1735	90	1878	78	0.1	1869	40
LYH22-7	5.34	0.41	0.3374	0.0079	0.0998	0.0067	0.1171	0.009	1875	68	1872	38	1930	120	1840	140	0.2	1872	38
LYH22-57	5.33	0.34	0.3392	0.007	0.0971	0.0069	0.1154	0.0084	1878	56	1883	33	1870	130	1850	130	0.3	1883	33
LYH22-59	5.43	0.22	0.3403	0.0045	0.098	0.0071	0.1156	0.0053	1885	35	1888	22	1890	130	1870	84	0.2	1888	22
LYH22-4	5.66	0.53	0.3438	0.0081	0.094	0.01	0.119	0.011	1908	83	1904	39	1800	190	1890	170	0.2	1904	39
LYH22-95	5.61	0.21	0.347	0.0087	0.1095	0.0067	0.1171	0.004	1917	32	1919	41	2100	120	1909	60	0.1	1919	41
LYH22-56	5.71	0.12	0.3495	0.0043	0.1185	0.004	0.1204	0.0027	1930	19	1931	21	2260	71	1956	41	0.1	1931	21
LYH22-94	5.73	0.45	0.352	0.011	0.096	0.015	0.112	0.011	1931	68	1944	52	1840	280	1880	150	0.7	1944	52
LYH22-31	6.48	0.24	0.3732	0.0055	0.1056	0.0059	0.1272	0.0042	2046	35	2044	26	2030	110	2064	62	0.1	2044	26
LYH22-115	7.63	0.37	0.406	0.01	0.1204	0.007	0.1371	0.0057	2196	49	2196	48	2300	130	2199	65	0	2196	48
LYH22-114	7.83	0.44	0.408	0.013	0.1241	0.0094	0.1361	0.007	2215	50	2215	59	2360	170	2185	90	0	2215	59
LYH22-101	7.91	0.16	0.4105	0.0063	0.1249	0.0036	0.1378	0.0026	2215	19	2219	29	2376	64	2199	33	0.2	2219	29
LYH22-81	9.81	0.2	0.4536	0.0062	0.132	0.0036	0.1567	0.0027	2417	19	2416	27	2503	65	2414	30	0	2416	27
LYH22-19	10.42	0.69	0.4594	0.0063	0.1372	0.0052	0.1632	0.0099	2434	61	2436	28	2594	93	2400	100	0.1	2436	28
LYH22-45	10.44	0.35	0.4654	0.0093	0.152	0.018	0.1676	0.0053	2468	31	2469	42	2830	310	2531	50	0	2469	42
LYH22-71	10.5	0.32	0.4672	0.0076	0.1493	0.0056	0.167	0.0045	2475	28	2475	34	2809	99	2526	47	0	2475	34
LYH22-55	10.59	0.39	0.47	0.011	0.1343	0.0089	0.1643	0.0045	2482	34	2483	46	2570	150	2494	45	0	2483	46
LYH22-119	10.55	0.27	0.4706	0.0091	0.142	0.0052	0.1625	0.0042	2481	24	2484	39	2675	92	2490	43	0.1	2484	39
LYH22-47	10.92	0.31	0.4762	0.0062	0.1492	0.0085	0.1674	0.0056	2512	26	2510	27	2800	150	2519	56	0.1	2510	27
LYH22-98	11.21	0.56	0.482	0.014	0.129	0.012	0.1658	0.0078	2530	46	2534	62	2450	210	2518	78	0.2	2534	62
LYH22-1	11.5	1.4	0.4838	0.0078	0.133	0.012	0.176	0.02	2550	110	2544	34	2520	210	2580	190	0.2	2544	34
LYH22-62	11.41	0.71	0.486	0.013	0.1504	0.0098	0.173	0.011	2556	61	2552	54	2830	170	2570	110	0.2	2552	54
LYH22-93	11.65	0.93	0.482	0.025	0.151	0.019	0.17	0.01	2569	72	2570	120	2830	320	2590	120	0	2570	120
LYH22-38	12.37	0.25	0.5047	0.0052	0.1508	0.0031	0.1794	0.0029	2630	19	2632	22	2841	54	2644	26	0.1	2632	22
LYH22-85	13.08	0.7	0.517	0.023	0.149	0.024	0.1828	0.0087	2684	49	2690	100	2790	420	2676	80	0.2	2690	100
LYH22-117	17.5	1.3	0.581	0.033	0.203	0.021	0.225	0.012	2965	70	2970	130	3720	340	2997	85	0.2	2970	130

## Sheet: Sample2
Analysis	Ratios								Ages								Discordance (%)	Best Age (Ma)
	207Pb/235U		206Pb/238U		208Pb/232Th		207Pb/206Pb		207Pb/235U		206Pb/238U		208Pb/232Th		207Pb/206Pb
		2 s.e.		2 s.e.		2 s.e.		2 s.e.		2 s.e.		2 s.e.		2 s.e.		2 s.e.			2 s.e.
LYH85-70	0.163	0.066	0.0243	0.0016	0.0101	0.0026	0.05	0.02	151	59	155	10	202	52	140	760	2.6	155	10
LYH85-54	0.179	0.038	0.0266	0.0012	0.0086	0.00076	0.052	0.012	165	33	169.1	7.6	173	15	200	410	2.4	169.1	7.6
LYH85-100	0.191	0.024	0.02685	0.00086	0.0071	0.0012	0.0514	0.0068	174	20	170.7	5.4	143	25	140	230	1.9	170.7	5.4
LYH85-40	0.254	0.021	0.03554	0.00072	0.01191	0.00086	0.0536	0.0043	227	17	225.1	4.5	239	17	280	150	0.8	225.1	4.5
LYH85-41	0.26	0.024	0.0373	0.0012	0.012	0.001	0.0488	0.0039	233	19	235.8	7.4	241	20	130	160	1.2	235.8	7.4
LYH85-20	0.267	0.02	0.03783	0.00078	0.01309	0.00077	0.0527	0.0042	235	16	239.3	4.8	263	15	220	150	1.8	239.3	4.8
LYH85-56	0.289	0.029	0.03999	0.00092	0.0138	0.00098	0.0517	0.0052	257	22	252.7	5.7	277	20	220	180	1.7	252.7	5.7
LYH85-23	0.293	0.053	0.0404	0.0013	0.0144	0.0016	0.0497	0.0089	256	40	255.4	8	289	32	270	350	0.2	255.4	8
LYH85-115	0.28	0.09	0.0409	0.0043	0.0105	0.0032	0.045	0.015	256	76	258	26	210	64	180	590	0.8	258	26
LYH85-74	0.304	0.022	0.04161	0.00091	0.0157	0.0012	0.0559	0.0043	266	17	262.7	5.6	315	25	330	140	1.3	262.7	5.6
LYH85-29	0.309	0.043	0.0419	0.0017	0.0124	0.0014	0.0523	0.0072	266	34	266	10	248	28	360	270	0	266	10
LYH85-7	0.304	0.021	0.0434	0.00071	0.01445	0.00099	0.052	0.0036	271	16	273.9	4.4	290	20	290	130	1.1	273.9	4.4
LYH85-53	0.321	0.024	0.04417	0.00099	0.01467	0.00081	0.0534	0.0041	280	19	278.5	6.1	294	16	290	150	0.5	278.5	6.1
LYH85-9	0.34	0.16	0.0447	0.0034	0.0122	0.0052	0.052	0.024	280	120	282	21	240	100	90	800	0.7	282	21
LYH85-46	0.34	0.057	0.0453	0.0021	0.0129	0.0018	0.0538	0.0092	286	43	285	13	258	36	170	280	0.4	285	13
LYH85-49	0.328	0.092	0.0456	0.0028	0.013	0.0016	0.052	0.014	288	72	287	17	260	32	210	470	0.3	287	17
LYH85-21	0.328	0.021	0.04583	0.00092	0.01546	0.00085	0.0536	0.0035	285	16	288.8	5.7	311	17	300	130	1.3	288.8	5.7
LYH85-14	0.336	0.019	0.04648	0.00071	0.01451	0.00062	0.0535	0.0032	292	15	292.8	4.4	291	12	340	120	0.3	292.8	4.4
LYH85-99	0.357	0.036	0.0471	0.0014	0.0157	0.0015	0.0534	0.0053	299	27	296.3	8.6	313	29	320	180	0.9	296.3	8.6
LYH85-105	0.389	0.023	0.053	0.0011	0.01697	0.00099	0.0542	0.0032	336	17	333.1	7	340	20	360	120	0.9	333.1	7
LYH85-113	0.398	0.045	0.0549	0.0035	0.0181	0.0026	0.0527	0.0059	348	28	344	22	362	52	280	230	1.2	344	22
LYH85-35	0.494	0.036	0.0656	0.0013	0.0212	0.0018	0.057	0.0039	407	23	409.3	8.1	425	35	400	140	0.6	409.3	8.1
LYH85-121	0.515	0.077	0.067	0.0038	0.0265	0.0038	0.0555	0.0063	420	52	418	23	529	74	410	250	0.5	418	23
LYH85-55	0.524	0.078	0.069	0.0037	0.024	0.019	0.0554	0.0087	426	52	430	23	480	380	390	330	0.9	430	23
LYH85-38	0.551	0.039	0.0704	0.0013	0.0237	0.0011	0.0564	0.004	440	25	438.5	7.6	473	21	420	140	0.3	438.5	7.6
LYH85-93	0.552	0.036	0.0706	0.0014	0.0237	0.0016	0.0577	0.0039	443	23	439.6	8.2	474	32	520	150	0.8	439.6	8.2
LYH85-71	0.545	0.027	0.0717	0.0014	0.0267	0.0019	0.055	0.0028	443	18	446.4	8.5	532	36	430	110	0.8	446.4	8.5
LYH85-81	0.564	0.064	0.072	0.0029	0.0257	0.0024	0.0584	0.0069	447	43	448	18	513	48	500	250	0.2	448	18
LYH85-43	0.569	0.063	0.0721	0.0023	0.0249	0.0038	0.0584	0.0063	449	40	449	14	495	75	440	220	0	449	14
LYH85-76	0.555	0.04	0.0723	0.0018	0.0221	0.0022	0.0535	0.0039	447	26	450	11	442	44	430	150	0.7	450	11
LYH85-109	0.584	0.041	0.0736	0.0015	0.0232	0.0016	0.0569	0.004	457	26	457.7	9.2	463	31	410	140	0.2	457.7	9.2
LYH85-114	0.58	0.037	0.0746	0.0014	0.0231	0.0012	0.0568	0.0036	462	23	463.6	8.5	461	24	460	120	0.3	463.6	8.5
LYH85-73	0.597	0.04	0.0749	0.0016	0.0239	0.0013	0.0603	0.0043	469	25	465.3	9.3	477	25	570	140	0.8	465.3	9.3
LYH85-59	0.584	0.07	0.075	0.0031	0.0271	0.0031	0.0566	0.0062	465	47	466	18	540	62	390	220	0.2	466	18
LYH85-68	0.598	0.057	0.0753	0.0023	0.0237	0.0019	0.0596	0.0056	472	37	468	14	473	38	530	210	0.9	468	14
LYH85-80	0.605	0.09	0.0755	0.0048	0.0253	0.0042	0.0602	0.0084	469	59	469	29	504	83	630	280	0	469	29
LYH85-32	0.587	0.042	0.0756	0.0014	0.0235	0.0012	0.0572	0.004	467	27	469.3	8.4	470	24	480	140	0.5	469.3	8.4
LYH85-36	0.605	0.037	0.0759	0.0013	0.0268	0.0013	0.0583	0.0036	475	24	471.6	7.6	534	26	490	120	0.7	471.6	7.6
LYH85-4	0.581	0.039	0.0772	0.002	0.0239	0.0023	0.0541	0.0037	475	24	479	12	478	46	360	150	0.8	479	12
LYH85-67	0.607	0.026	0.0773	0.001	0.0256	0.0011	0.0577	0.0025	477	17	480	6.2	510	22	486	89	0.6	480	6.2
LYH85-51	0.58	0.052	0.0777	0.0019	0.0246	0.0016	0.0577	0.0053	480	35	482	11	489	32	390	170	0.4	482	11
LYH85-11	0.62	0.043	0.0782	0.0016	0.0242	0.0018	0.0585	0.0044	489	28	485.6	9.6	483	35	540	160	0.7	485.6	9.6
LYH85-101	0.618	0.06	0.0785	0.0021	0.0256	0.0018	0.056	0.0055	486	38	487	12	510	36	420	200	0.2	487	12
LYH85-104	0.627	0.035	0.0792	0.002	0.0244	0.0013	0.0573	0.0033	490	22	491	12	488	26	450	120	0.2	491	12
LYH85-119	0.646	0.086	0.0801	0.0037	0.0189	0.0033	0.0602	0.0084	500	52	497	22	378	66	520	280	0.6	497	22
LYH85-48	0.638	0.066	0.08	0.0023	0.0256	0.0022	0.0559	0.006	500	42	498	13	509	43	370	200	0.4	498	13
LYH85-79	0.66	0.13	0.0812	0.0052	0.0217	0.0066	0.062	0.014	502	79	503	31	430	130	510	450	0.2	503	31
LYH85-16	0.659	0.038	0.0817	0.0016	0.0255	0.0011	0.0608	0.0036	509	23	506.2	9.3	510	22	540	120	0.6	506.2	9.3
LYH85-86	0.645	0.06	0.0823	0.0032	0.0284	0.0036	0.0601	0.0062	511	39	510	19	565	70	530	220	0.2	510	19
LYH85-45	0.63	0.1	0.0829	0.0035	0.0239	0.0032	0.0539	0.0087	514	56	513	21	476	63	330	310	0.2	513	21
LYH85-33	0.667	0.028	0.083	0.0011	0.02701	0.00084	0.0594	0.0023	518	17	514.6	6.4	539	16	547	82	0.7	514.6	6.4
LYH85-60	0.668	0.039	0.0834	0.0016	0.0231	0.002	0.0593	0.0037	514	24	515.9	9.6	460	39	510	120	0.4	515.9	9.6
LYH85-17	0.673	0.063	0.0852	0.0032	0.0249	0.0026	0.0561	0.0052	523	39	527	19	496	52	460	190	0.8	527	19
LYH85-103	0.711	0.024	0.0876	0.0013	0.0278	0.0013	0.0587	0.0022	544	14	542.2	7.8	554	25	556	80	0.3	542.2	7.8
LYH85-52	0.705	0.026	0.0886	0.0011	0.0283	0.0013	0.0583	0.0021	544	16	547.1	6.7	564	26	515	79	0.6	547.1	6.7
LYH85-66	0.739	0.075	0.0909	0.0072	0.0292	0.0052	0.0589	0.0094	559	43	560	42	580	100	490	340	0.2	560	42
LYH85-82	0.763	0.058	0.0916	0.0034	0.028	0.0023	0.0627	0.0038	570	33	567	20	563	44	690	130	0.5	567	20
LYH85-94	0.95	0.18	0.1103	0.0097	0.039	0.019	0.063	0.011	672	93	674	56	760	370	640	370	0.3	674	56
LYH85-13	1.088	0.079	0.1221	0.0039	0.0387	0.0022	0.0676	0.0042	740	38	742	23	766	43	840	130	0.3	742	23
LYH85-8	1.27	0.34	0.137	0.011	0.0486	0.0047	0.067	0.015	830	150	828	62	958	91	870	440	0.2	828	62
LYH85-106	1.382	0.073	0.1456	0.0032	0.051	0.0041	0.0689	0.0032	879	31	876	18	1004	79	900	100	0.3	876	18
LYH85-91	1.46	0.16	0.1518	0.0063	0.034	0.018	0.068	0.0054	909	65	911	35	670	350	900	210	0.2	911	35
LYH85-61	1.538	0.093	0.156	0.0033	0.051	0.0026	0.0716	0.0043	930	36	933	19	1003	49	870	120	0.3	933	19
LYH85-27	1.59	0.36	0.1574	0.0057	0.0372	0.0067	0.073	0.017	940	140	942	32	740	130	850	490	0.2	942	32
LYH85-25	1.6	0.1	0.1605	0.003	0.0505	0.0024	0.0735	0.0047	963	40	959	17	994	45	930	130	0.4	959	17
LYH85-15	1.682	0.072	0.1686	0.0027	0.0653	0.0032	0.0732	0.0029	1004	27	1004	15	1276	61	1013	81	0	1004	15
LYH85-18	1.74	0.15	0.1714	0.0054	0.0505	0.004	0.0735	0.0063	1022	52	1025	28	1009	74	1050	170	0.3	1025	28
LYH85-110	1.816	0.082	0.1773	0.0041	0.0536	0.0025	0.075	0.0031	1052	30	1054	22	1054	48	1074	85	0.2	1054	22
LYH85-30	1.847	0.065	0.1786	0.0019	0.059	0.0021	0.0754	0.0025	1057	23	1059	10	1161	39	1059	68	0.2	1059	10
LYH85-108	1.89	0.13	0.1816	0.0045	0.0557	0.0063	0.0711	0.0049	1074	43	1075	25	1090	120	980	150	0.1	1075	25
LYH85-111	1.92	0.13	0.182	0.0045	0.0545	0.0039	0.0772	0.0053	1076	45	1077	25	1068	74	1090	140	0.1	1077	25
LYH85-34	1.93	0.21	0.1825	0.0062	0.0534	0.0041	0.078	0.0081	1077	76	1079	33	1051	78	1090	200	0.2	1079	33
LYH85-26	1.88	0.11	0.1826	0.0028	0.0599	0.0028	0.0759	0.0042	1077	40	1081	15	1191	56	1050	120	0.4	1081	15
LYH85-84	2.25	0.15	0.2036	0.0036	0.0635	0.0023	0.0803	0.0055	1195	49	1194	20	1245	44	1200	130	0.1	1194	20
LYH85-112	2.33	0.13	0.2071	0.0044	0.0649	0.0058	0.0797	0.0046	1213	39	1217	24	1270	110	1160	110	0.3	1217	24
LYH85-24	2.85	0.51	0.2376	0.0097	0.081	0.014	0.086	0.012	1370	140	1374	51	1580	260	1390	280	0.3	1374	51
LYH85-65	3.21	0.34	0.2443	0.0071	0.104	0.034	0.0979	0.0084	1403	52	1407	37	1710	350	1420	110	0.3	1407	37
LYH85-90	3.37	0.16	0.2605	0.0081	0.071	0.0053	0.0948	0.0054	1493	37	1491	42	1380	100	1530	100	0.1	1491	42
LYH85-78	3.43	0.13	0.2635	0.0046	0.0698	0.0025	0.0983	0.0032	1510	28	1509	24	1363	47	1581	62	0.1	1509	24
LYH85-63	3.59	0.21	0.2686	0.0068	0.0702	0.0048	0.0973	0.0055	1536	46	1537	35	1379	92	1540	110	0.1	1537	35
LYH85-92	3.8	1.2	0.271	0.02	0.105	0.02	0.1	0.028	1550	280	1550	100	2020	380	1530	570	0	1550	100
LYH85-95	4.36	0.21	0.3015	0.007	0.1013	0.0055	0.107	0.0057	1699	40	1697	35	1950	100	1760	100	0.1	1697	35
LYH85-22	5.01	0.48	0.324	0.013	0.104	0.031	0.108	0.012	1811	81	1806	65	1970	560	1860	190	0.3	1806	65
LYH85-10	5.01	0.79	0.324	0.01	0.093	0.021	0.114	0.019	1800	130	1807	50	1780	390	1800	300	0.4	1807	50
LYH85-47	4.91	0.45	0.325	0.011	0.0886	0.0068	0.114	0.01	1812	84	1814	55	1710	130	1820	160	0.1	1814	55
LYH85-19	5.12	0.86	0.329	0.032	0.107	0.018	0.116	0.015	1830	150	1830	150	2040	340	1880	230	0	1830	150
LYH85-116	5.15	0.39	0.329	0.011	0.0999	0.0076	0.1149	0.0096	1832	63	1833	52	1920	140	1830	150	0.1	1833	52
LYH85-62	5.11	0.26	0.331	0.012	0.0944	0.0086	0.1125	0.0076	1839	46	1841	59	1820	160	1820	120	0.1	1841	59
LYH85-64	5.19	0.17	0.3324	0.0051	0.1053	0.0039	0.1176	0.0033	1846	27	1848	24	2025	73	1923	52	0.1	1848	24
LYH85-42	5.06	0.33	0.3328	0.0068	0.092	0.015	0.1103	0.0084	1848	42	1852	33	1780	270	1790	140	0.2	1852	33
LYH85-107	5.3	0.28	0.3319	0.0062	0.1041	0.0065	0.116	0.0061	1850	42	1853	30	1990	120	1822	90	0.2	1853	30
LYH85-75	5.35	0.2	0.3417	0.0057	0.1025	0.0035	0.1156	0.004	1886	31	1893	27	1969	63	1890	62	0.4	1893	27
LYH85-37	5.4	0.53	0.343	0.013	0.12	0.018	0.112	0.012	1867	88	1898	60	2270	320	1770	200	1.6	1898	60
LYH85-57	5.72	0.17	0.3502	0.0059	0.0965	0.0076	0.1185	0.0035	1930	26	1935	28	1880	140	1921	54	0.3	1935	28
LYH85-31	6.45	0.57	0.3669	0.0086	0.145	0.017	0.129	0.011	2014	78	2014	41	2710	290	2020	150	0	2014	41
LYH85-12	8.2	4.9	0.384	0.051	0.17	0.21	0.166	0.095	2090	600	2090	240	2900	3600	2000	1400	0	2090	240
LYH85-89	8.14	0.99	0.413	0.026	0.122	0.016	0.144	0.016	2220	110	2220	120	2320	300	2270	220	0	2220	120
LYH85-97	8.89	0.96	0.435	0.048	0.136	0.04	0.154	0.025	2320	100	2320	220	2560	690	2350	280	0	2320	220
LYH85-69	9.4	1.3	0.443	0.019	0.154	0.014	0.155	0.023	2360	130	2362	86	2900	250	2360	270	0.1	2362	86
LYH85-5	10.25	0.36	0.4656	0.006	0.1342	0.0056	0.158	0.0053	2459	32	2462	26	2544	98	2418	56	0.1	2462	26
LYH85-39	10.62	0.32	0.4705	0.0072	0.1261	0.004	0.1645	0.0048	2486	28	2483	32	2396	71	2497	49	0.1	2483	32
LYH85-118	10.61	0.29	0.4699	0.0059	0.136	0.0042	0.1657	0.0042	2488	26	2485	26	2572	74	2524	43	0.1	2485	26
LYH85-3	11	1.6	0.474	0.027	0.149	0.016	0.17	0.02	2490	120	2500	120	2790	280	2490	210	0.4	2500	120
LYH85-88	11.6	2.1	0.499	0.028	0.163	0.038	0.174	0.019	2600	140	2610	120	3020	660	2570	180	0.4	2610	120
LYH85-44	15.7	1.2	0.563	0.03	0.177	0.025	0.207	0.023	2878	57	2880	120	3290	430	2910	150	0.1	2880	120
LYH85-2	21.34	0.57	0.6297	0.0076	0.1659	0.0043	0.2443	0.0057	3145	26	3146	30	3098	75	3148	35	0	3146	30

## Sheet: Sample3
Analysis	Ratios								Ages								Discordance (%)	Best Age (Ma)
	207Pb/235U		206Pb/238U		208Pb/232Th		207Pb/206Pb		207Pb/235U		206Pb/238U		208Pb/232Th		207Pb/206Pb
		2 s.e.		2 s.e.		2 s.e.		2 s.e.		2 s.e.		2 s.e.		2 s.e.		2 s.e.			2 s.e.
LYH98-62	0.19	0.052	0.0258	0.0016	0.0077	0.001	0.053	0.014	168	43	164	10	155	21	160	450	2.4	164	10
LYH98-119	0.217	0.016	0.03124	0.00064	0.0111	0.0018	0.0506	0.0038	197	14	198.2	4	226	36	170	140	0.6	198.2	4
LYH98-107	0.235	0.037	0.0325	0.0016	0.0113	0.0012	0.059	0.01	209	30	205.8	9.9	227	25	310	300	1.6	205.8	9.9
LYH98-31	0.236	0.014	0.0333	0.00054	0.01074	0.00053	0.0512	0.003	215	11	211.2	3.3	216	11	230	110	1.8	211.2	3.3
LYH98-21	0.245	0.061	0.0342	0.0024	0.0102	0.0023	0.053	0.013	216	49	217	15	205	46	410	480	0.5	217	15
LYH98-7	0.257	0.015	0.03561	0.00056	0.01137	0.00057	0.0537	0.0031	229	12	225.5	3.5	228	11	260	100	1.6	225.5	3.5
LYH98-103	0.308	0.057	0.0357	0.002	0.013	0.0021	0.063	0.012	225	39	226	12	259	42	20	290	0.4	226	12
LYH98-82	0.255	0.031	0.036	0.0012	0.011	0.0012	0.0525	0.0066	232	25	228.2	7.5	221	25	290	230	1.7	228.2	7.5
LYH98-111	0.273	0.078	0.0362	0.0032	0.0123	0.0027	0.057	0.019	230	63	229	20	246	54	120	510	0.4	229	20
LYH98-27	0.262	0.016	0.03665	0.00073	0.01142	0.00057	0.0525	0.0034	235	13	232	4.5	229	11	280	120	1.3	232	4.5
LYH98-66	0.258	0.015	0.03674	0.00076	0.01191	0.00055	0.0511	0.0031	232	12	232.5	4.7	240	11	210	110	0.2	232.5	4.7
LYH98-45	0.258	0.046	0.038	0.0022	0.0105	0.0016	0.0489	0.009	238	33	240	14	211	32	180	290	0.8	240	14
LYH98-79	0.299	0.029	0.0401	0.0011	0.01274	0.00088	0.0555	0.0057	256	22	253.6	6.7	256	18	240	180	0.9	253.6	6.7
LYH98-41	0.31	0.1	0.043	0.0032	0.0174	0.0036	0.049	0.015	270	81	271	20	348	71	80	520	0.4	271	20
LYH98-44	0.333	0.044	0.0448	0.0017	0.0143	0.0015	0.0544	0.0071	286	33	283	10	286	29	320	260	1.1	283	10
LYH98-13	0.352	0.04	0.0477	0.0014	0.016	0.0018	0.0531	0.0068	302	30	300.4	8.6	322	35	330	240	0.5	300.4	8.6
LYH98-33	0.396	0.039	0.0545	0.0015	0.0191	0.0013	0.0529	0.0054	344	27	342	9.1	383	26	350	180	0.6	342	9.1
LYH98-52	0.484	0.072	0.0628	0.0032	0.0202	0.002	0.0561	0.0077	395	49	393	19	404	39	580	280	0.5	393	19
LYH98-12	0.527	0.055	0.0655	0.002	0.0201	0.0013	0.0594	0.0062	408	36	409	12	401	27	430	200	0.2	409	12
LYH98-6	0.515	0.09	0.0657	0.0026	0.0157	0.0027	0.059	0.011	412	61	410	15	314	53	420	380	0.5	410	15
LYH98-16	0.5	0.048	0.0662	0.0017	0.0207	0.0014	0.0552	0.0054	411	32	413	10	414	28	410	180	0.5	413	10
LYH98-63	0.527	0.034	0.0678	0.0014	0.0217	0.0011	0.057	0.0036	424	23	422.6	8.2	433	22	470	130	0.3	422.6	8.2
LYH98-2	0.52	0.021	0.06816	0.00074	0.02109	0.0008	0.0566	0.0022	427	14	425	4.5	422	16	440	79	0.5	425	4.5
LYH98-72	0.534	0.029	0.0688	0.0013	0.0227	0.0013	0.0567	0.003	432	19	429.4	8	454	26	410	100	0.6	429.4	8
LYH98-118	0.56	0.1	0.0696	0.0037	0.0258	0.0034	0.061	0.011	438	63	438	21	513	68	560	350	0	438	21
LYH98-19	0.556	0.084	0.071	0.0025	0.0214	0.0026	0.058	0.01	442	56	442	15	442	46	500	350	0	442	15
LYH98-114	0.572	0.084	0.0711	0.0029	0.0243	0.002	0.0579	0.0079	443	54	443	17	485	40	440	270	0	443	17
LYH98-29	0.565	0.07	0.0712	0.0026	0.023	0.0017	0.0571	0.0071	447	44	444	15	460	34	480	260	0.7	444	15
LYH98-18	0.555	0.059	0.072	0.0023	0.0226	0.002	0.0567	0.0059	450	38	448	14	451	39	450	200	0.4	448	14
LYH98-70	0.576	0.091	0.0722	0.0026	0.0232	0.0031	0.0595	0.0098	449	60	449	15	463	61	360	300	0	449	15
LYH98-89	0.598	0.076	0.0724	0.0023	0.0243	0.0022	0.0593	0.0076	454	47	450	14	485	43	410	230	0.9	450	14
LYH98-100	0.543	0.059	0.0727	0.0022	0.0222	0.0017	0.0572	0.0062	448	40	452	13	444	34	430	210	0.9	452	13
LYH98-112	0.589	0.098	0.0726	0.0036	0.0228	0.0026	0.059	0.01	452	62	452	22	454	51	410	320	0	452	22
LYH98-59	0.58	0.15	0.0734	0.0052	0.0246	0.0056	0.064	0.018	460	100	456	31	490	110	520	520	0.9	456	31
LYH98-87	0.61	0.15	0.0734	0.0038	0.025	0.0038	0.054	0.013	456	91	456	23	497	75	260	400	0	456	23
LYH98-26	0.569	0.072	0.0734	0.0024	0.0241	0.0019	0.0575	0.0081	453	49	457	14	481	37	480	280	0.9	457	14
LYH98-95	0.585	0.041	0.0738	0.0015	0.0235	0.0014	0.0572	0.004	460	26	458.8	8.9	468	27	430	140	0.3	458.8	8.9
LYH98-74	0.571	0.063	0.0735	0.0031	0.0241	0.0028	0.0596	0.0079	459	40	459	18	479	55	410	240	0	459	18
LYH98-39	0.578	0.048	0.0739	0.0016	0.023	0.0013	0.0553	0.0045	456	31	459.2	9.8	458	25	390	160	0.7	459.2	9.8
LYH98-11	0.567	0.023	0.0739	0.0013	0.0234	0.0013	0.0562	0.0023	456	15	459.5	8	468	25	454	91	0.8	459.5	8
LYH98-46	0.572	0.049	0.0743	0.0017	0.0233	0.0016	0.0573	0.0052	458	32	461	10	464	31	380	170	0.7	461	10
LYH98-57	0.59	0.1	0.0744	0.0036	0.0214	0.0032	0.06	0.011	461	68	462	21	428	64	470	350	0.2	462	21
LYH98-108	0.596	0.08	0.0744	0.0024	0.0243	0.0024	0.0573	0.0071	465	52	462	14	484	48	500	250	0.6	462	14
LYH98-65	0.588	0.038	0.0745	0.0015	0.0224	0.001	0.0585	0.0037	461	25	462.8	8.9	447	20	480	130	0.4	462.8	8.9
LYH98-35	0.592	0.09	0.0745	0.0029	0.0249	0.0026	0.055	0.0087	461	57	463	18	497	51	360	290	0.4	463	18
LYH98-86	0.59	0.11	0.0749	0.0043	0.0258	0.003	0.0546	0.009	466	73	465	26	527	61	300	320	0.2	465	26
LYH98-22	0.592	0.029	0.0751	0.0011	0.0233	0.0013	0.057	0.0029	468	19	466.4	6.9	464	26	470	110	0.3	466.4	6.9
LYH98-69	0.599	0.039	0.0753	0.0017	0.0232	0.001	0.0596	0.004	472	24	469	10	462	20	500	130	0.6	469	10
LYH98-71	0.577	0.047	0.0755	0.0019	0.0248	0.0027	0.0563	0.0044	466	30	469	11	493	53	430	160	0.6	469	11
LYH98-77	0.631	0.07	0.0759	0.0026	0.0244	0.0021	0.061	0.0069	470	45	471	16	485	41	460	210	0.2	471	16
LYH98-53	0.597	0.054	0.0763	0.002	0.024	0.0016	0.0584	0.0055	471	36	474	12	480	31	420	170	0.6	474	12
LYH98-34	0.608	0.042	0.0768	0.002	0.0234	0.0012	0.0565	0.0036	479	27	477	12	467	25	470	130	0.4	477	12
LYH98-23	0.605	0.045	0.0775	0.0018	0.0253	0.0018	0.0562	0.0042	480	27	481	11	505	36	410	140	0.2	481	11
LYH98-17	0.627	0.029	0.0795	0.0011	0.0257	0.0012	0.0575	0.0026	491	17	492.7	6.4	512	24	471	90	0.3	492.7	6.4
LYH98-60	0.677	0.046	0.0848	0.0018	0.0274	0.0017	0.0594	0.0042	522	28	525	11	544	33	460	140	0.6	525	11
LYH98-36	0.93	0.11	0.1044	0.0061	0.036	0.0033	0.0629	0.0051	651	56	647	37	713	63	660	170	0.6	647	37
LYH98-14	0.99	0.11	0.1128	0.0041	0.0359	0.0043	0.0657	0.0084	685	58	689	24	710	84	670	250	0.6	689	24
LYH98-101	1.144	0.097	0.1237	0.0034	0.0412	0.0026	0.0681	0.0053	754	45	753	19	820	51	760	160	0.1	753	19
LYH98-113	1.22	0.17	0.1355	0.0047	0.0457	0.0039	0.0686	0.0099	818	78	819	27	902	75	700	300	0.1	819	27
LYH98-106	1.291	0.076	0.1373	0.0023	0.0481	0.0047	0.0684	0.0037	828	34	829	13	940	90	770	110	0.1	829	13
LYH98-93	1.75	0.42	0.156	0.011	0.067	0.014	0.078	0.018	930	160	929	61	1290	250	870	470	0.1	929	61
LYH98-38	1.51	0.07	0.1562	0.0021	0.0505	0.003	0.0699	0.0033	936	29	935	12	999	56	891	96	0.1	935	12
LYH98-83	1.545	0.08	0.1567	0.0025	0.0486	0.0021	0.0712	0.0037	941	31	938	14	957	41	890	110	0.3	938	14
LYH98-48	1.58	0.19	0.1593	0.0063	0.0537	0.006	0.0708	0.0089	946	74	953	35	1050	120	840	260	0.7	953	35
LYH98-97	1.65	0.13	0.1611	0.0034	0.05	0.0029	0.0731	0.0054	965	50	964	18	984	56	930	150	0.1	964	18
LYH98-40	1.68	0.17	0.1684	0.0057	0.0508	0.007	0.073	0.0073	1003	60	1003	31	1000	130	980	190	0	1003	31
LYH98-50	1.83	0.14	0.1697	0.0035	0.0526	0.0043	0.076	0.0052	1018	43	1013	19	1029	81	1010	120	0.5	1013	19
LYH98-115	1.75	0.11	0.1714	0.0024	0.0553	0.0027	0.0734	0.0042	1018	41	1020	13	1090	51	960	120	0.2	1020	13
LYH98-116	1.95	0.16	0.1812	0.005	0.0652	0.0043	0.0763	0.0051	1075	56	1074	28	1270	82	1010	140	0.1	1074	28
LYH98-121	1.99	0.32	0.185	0.01	0.0614	0.0068	0.08	0.014	1090	120	1091	56	1200	130	1030	370	0.1	1091	56
LYH98-4	2.13	0.61	0.191	0.016	0.0718	0.006	0.084	0.024	1130	230	1129	86	1400	110	1140	730	0.1	1129	86
LYH98-43	2.18	0.46	0.198	0.015	0.073	0.026	0.078	0.014	1160	150	1162	83	1410	500	1080	460	0.2	1162	83
LYH98-61	2.16	0.15	0.1975	0.005	0.0608	0.0049	0.0808	0.006	1169	50	1165	26	1189	94	1180	150	0.3	1165	26
LYH98-1	3.06	0.16	0.2462	0.0052	0.0718	0.005	0.0904	0.0044	1418	39	1418	27	1400	94	1452	93	0	1418	27
LYH98-81	3.57	0.29	0.269	0.015	0.094	0.012	0.0996	0.0063	1535	68	1532	75	1810	230	1600	120	0.2	1532	75
LYH98-51	3.82	0.47	0.279	0.014	0.0848	0.0097	0.1	0.013	1580	100	1583	71	1640	180	1620	270	0.2	1583	71
LYH98-32	3.91	0.21	0.2847	0.0042	0.0848	0.0052	0.0983	0.005	1613	45	1614	21	1638	96	1571	98	0.1	1614	21
LYH98-91	4.38	0.3	0.2996	0.0079	0.0949	0.0048	0.1053	0.0067	1689	59	1693	39	1851	91	1640	120	0.2	1693	39
LYH98-37	4.42	0.33	0.3012	0.009	0.0921	0.009	0.1076	0.0086	1698	65	1699	44	1750	160	1640	160	0.1	1699	44
LYH98-96	4.1	0.71	0.3	0.018	0.096	0.015	0.106	0.021	1710	150	1709	82	1840	270	1790	310	0.1	1709	82
LYH98-67	4.55	0.3	0.3054	0.0071	0.0918	0.0065	0.1065	0.0072	1718	59	1717	35	1790	120	1700	130	0.1	1717	35
LYH98-78	4.67	0.31	0.3083	0.0088	0.1009	0.0046	0.1115	0.0072	1738	55	1736	44	1940	84	1780	120	0.1	1736	44
LYH98-20	4.62	0.23	0.313	0.0062	0.0906	0.0078	0.108	0.0056	1753	43	1755	30	1730	140	1727	97	0.1	1755	30
LYH98-56	4.63	0.38	0.314	0.013	0.091	0.01	0.1088	0.009	1771	73	1770	59	1750	190	1780	160	0.1	1770	59
LYH98-68	4.57	0.73	0.311	0.032	0.079	0.026	0.106	0.018	1770	140	1780	170	1510	480	1660	290	0.6	1780	170
LYH98-9	4.74	0.3	0.3186	0.0088	0.0911	0.0071	0.1097	0.0068	1782	55	1782	43	1750	130	1830	120	0	1782	43
LYH98-8	4.66	0.67	0.319	0.013	0.113	0.014	0.11	0.016	1780	110	1783	65	2160	250	1800	250	0.2	1783	65
LYH98-24	4.98	0.4	0.3221	0.0087	0.0956	0.009	0.1103	0.0089	1796	71	1798	42	1830	170	1780	150	0.1	1798	42
LYH98-73	4.98	0.42	0.322	0.0083	0.0913	0.0067	0.1111	0.0089	1796	73	1799	40	1760	120	1780	150	0.2	1799	40
LYH98-42	4.99	0.26	0.3226	0.0073	0.0948	0.0057	0.1122	0.0062	1803	46	1802	35	1830	110	1800	110	0.1	1802	35
LYH98-54	5	0.51	0.324	0.02	0.098	0.016	0.103	0.012	1803	82	1804	99	1890	280	1800	220	0.1	1804	99
LYH98-5	4.97	0.11	0.3249	0.0032	0.0992	0.0028	0.113	0.0027	1809	19	1813	15	1908	52	1846	42	0.2	1813	15
LYH98-3	5.11	0.13	0.3285	0.0039	0.0904	0.0038	0.1141	0.0025	1834	22	1831	19	1748	71	1873	43	0.2	1831	19
LYH98-49	5.2	0.19	0.3319	0.0051	0.1083	0.0055	0.1137	0.0042	1850	32	1845	25	2070	100	1841	68	0.3	1845	25
LYH98-85	5.66	0.87	0.335	0.016	0.116	0.02	0.117	0.018	1880	140	1882	73	2200	370	1870	290	0.1	1882	73
LYH98-10	5.51	0.11	0.3415	0.0031	0.1025	0.0037	0.1188	0.0023	1899	17	1896	15	1968	68	1929	34	0.2	1896	15
LYH98-104	6	1.3	0.345	0.028	0.114	0.02	0.125	0.022	1910	170	1910	130	2170	360	2030	330	0	1910	130
LYH98-88	5.94	0.65	0.347	0.011	0.1036	0.0086	0.121	0.012	1913	95	1915	53	1980	160	1870	180	0.1	1915	53
LYH98-109	5.92	0.95	0.347	0.012	0.103	0.014	0.117	0.018	1910	150	1917	58	1970	250	1910	290	0.4	1917	58
LYH98-25	5.79	0.32	0.3512	0.006	0.1112	0.0072	0.12	0.006	1941	48	1943	28	2120	130	1954	83	0.1	1943	28
LYH98-30	6.33	0.52	0.37	0.011	0.1014	0.009	0.1211	0.0084	2028	68	2030	53	1990	150	2010	130	0.1	2030	53
LYH98-117	6.64	0.46	0.3726	0.0085	0.115	0.0055	0.1286	0.0093	2043	63	2044	41	2207	99	2030	130	0	2044	41
LYH98-64	7	1.4	0.377	0.014	0.114	0.017	0.132	0.026	2060	180	2061	67	2280	360	1990	360	0	2061	67
LYH98-102	6.8	1	0.379	0.014	0.115	0.014	0.132	0.019	2060	140	2068	65	2180	250	2060	240	0.4	2068	65
LYH98-58	6.87	0.69	0.386	0.017	0.117	0.017	0.135	0.015	2100	97	2102	79	2220	300	2160	190	0.1	2102	79
LYH98-94	9.3	1.3	0.429	0.024	0.129	0.018	0.163	0.024	2310	140	2310	100	2430	320	2360	260	0	2310	100
LYH98-75	10.21	0.45	0.458	0.0089	0.1308	0.0051	0.1612	0.0065	2432	40	2434	36	2476	90	2430	70	0.1	2434	36
LYH98-47	11	1.7	0.47	0.024	0.132	0.02	0.164	0.023	2480	150	2480	110	2490	370	2420	240	0	2480	110
LYH98-55	11	2	0.47	0.027	0.14	0.015	0.165	0.025	2480	160	2480	120	2640	260	2430	250	0	2480	120
LYH98-105	11.15	0.62	0.4771	0.0093	0.1544	0.0073	0.1708	0.0096	2516	52	2517	40	2880	130	2499	97	0	2517	40
LYH98-80	14.5	1.2	0.5359	0.0096	0.1508	0.0091	0.192	0.015	2764	79	2765	40	2830	160	2720	130	0	2765	40
LYH98-120	16.1	1.7	0.55	0.025	0.166	0.011	0.218	0.022	2860	100	2857	77	3100	200	2860	170	0.1	2857	77

## Sheet: Sample4
Analysis	Ratios								Ages								Discordance (%)	Best Age (Ma)
	207Pb/235U		206Pb/238U		208Pb/232Th		207Pb/206Pb		207Pb/235U		206Pb/238U		208Pb/232Th		207Pb/206Pb
		2 s.e.		2 s.e.		2 s.e.		2 s.e.		2 s.e.		2 s.e.		2 s.e.		2 s.e.			2 s.e.
LYH140-54	0.1537	0.0058	0.02246	0.00023	0.00676	0.0002	0.0496	0.0018	145.6	5	143.2	1.5	136.1	4	165	71	1.7	143.2	1.5
LYH140-78	0.165	0.0057	0.0237	0.0003	0.00757	0.00025	0.0508	0.0018	154.7	5	151	1.9	152.4	4.9	225	71	2.5	151	1.9
LYH140-100	0.183	0.035	0.0251	0.0012	0.0083	0.001	0.054	0.011	157	29	159.9	7.9	166	20	100	320	1.8	159.9	7.9
LYH140-57	0.21	0.012	0.02994	0.00033	0.01031	0.00044	0.0509	0.0028	193.9	9.6	190.1	2.1	207.2	8.8	230	110	2	190.1	2.1
LYH140-46	0.214	0.023	0.03102	0.00095	0.0106	0.00051	0.0503	0.0057	194	20	196.9	6	213	10	140	200	1.5	196.9	6
LYH140-44	0.222	0.013	0.03148	0.0005	0.01038	0.00041	0.0514	0.0031	202	11	199.8	3.1	208.7	8.2	230	110	1.1	199.8	3.1
LYH140-112	0.217	0.012	0.03166	0.00054	0.01108	0.00081	0.0489	0.0029	198	10	200.9	3.4	222	16	180	110	1.4	200.9	3.4
LYH140-89	0.2219	0.0063	0.03177	0.0004	0.00915	0.00025	0.0509	0.0015	204	5.4	201.6	2.5	184.1	4.9	232	63	1.2	201.6	2.5
LYH140-8	0.225	0.031	0.0319	0.0025	0.00876	0.00099	0.0517	0.0049	206	26	202	16	176	20	270	210	2	202	16
LYH140-119	0.225	0.021	0.03261	0.00065	0.0104	0.0006	0.0501	0.0045	207	17	206.8	4.1	209	12	170	170	0.1	206.8	4.1
LYH140-86	0.228	0.01	0.03268	0.00047	0.01073	0.00054	0.0512	0.0023	208.9	8.7	207.3	2.9	216	11	243	90	0.8	207.3	2.9
LYH140-36	0.2306	0.0076	0.03277	0.00031	0.01077	0.0003	0.0514	0.0017	210.4	6.2	208	1.9	216.4	5.9	240	65	1.2	208	1.9
LYH140-24	0.2344	0.0094	0.03314	0.00052	0.01133	0.00037	0.0509	0.002	213.8	7.8	210.1	3.2	228.5	7.6	234	82	1.8	210.1	3.2
LYH140-23	0.2354	0.009	0.03379	0.00047	0.01117	0.0003	0.0505	0.0019	215.5	7.5	214.2	3	224.5	6.1	202	76	0.6	214.2	3
LYH140-90	0.241	0.014	0.03379	0.00052	0.01101	0.00043	0.0521	0.0029	217	11	214.2	3.2	221.2	8.5	250	110	1.3	214.2	3.2
LYH140-4	0.24	0.0065	0.03404	0.00035	0.01128	0.00031	0.0517	0.0016	218	5.3	215.8	2.2	226.8	6.2	282	65	1	215.8	2.2
LYH140-71	0.2434	0.0097	0.03484	0.00041	0.01151	0.00033	0.0505	0.002	221.3	7.7	220.8	2.5	231.2	6.7	206	76	0.2	220.8	2.5
LYH140-5	0.2509	0.0091	0.0354	0.0004	0.01198	0.0003	0.0525	0.0019	226.9	7.3	224.2	2.5	240.6	6	287	76	1.2	224.2	2.5
LYH140-37	0.281	0.018	0.03971	0.00072	0.01348	0.00069	0.0513	0.0031	252	15	251	4.5	271	14	240	120	0.4	251	4.5
LYH140-83	0.288	0.011	0.04039	0.00052	0.01328	0.00047	0.0527	0.002	257.9	9.1	255.2	3.2	266.5	9.4	299	78	1.1	255.2	3.2
LYH140-41	0.315	0.018	0.04365	0.00063	0.01501	0.00054	0.0524	0.003	278	14	275.4	3.9	302	11	280	120	0.9	275.4	3.9
LYH140-74	0.324	0.021	0.044	0.0011	0.01466	0.00066	0.0537	0.0036	277	15	277.2	6.6	294	13	230	120	0.1	277.2	6.6
LYH140-92	0.31	0.025	0.0445	0.0011	0.01328	0.00066	0.0507	0.0041	278	19	280.5	6.8	267	13	280	150	0.9	280.5	6.8
LYH140-43	0.326	0.015	0.04564	0.0007	0.01542	0.00074	0.0513	0.0024	285	12	287.7	4.3	309	15	248	95	0.9	287.7	4.3
LYH140-80	0.333	0.032	0.0462	0.0013	0.0159	0.0011	0.0553	0.0057	292	25	291	7.9	319	22	310	190	0.3	291	7.9
LYH140-20	0.412	0.068	0.0556	0.0019	0.0153	0.0025	0.0533	0.0081	348	50	349	11	307	50	320	320	0.3	349	11
LYH140-88	0.454	0.02	0.0603	0.001	0.01771	0.00055	0.0559	0.0025	381	14	377.4	6.3	355	11	411	95	1	377.4	6.3
LYH140-6	0.461	0.024	0.0618	0.001	0.02083	0.00067	0.0558	0.0029	388	17	386.8	6.1	417	13	410	110	0.3	386.8	6.1
LYH140-28	0.468	0.018	0.0626	0.001	0.02404	0.00097	0.0557	0.002	389	12	391.4	6.1	480	19	418	76	0.6	391.4	6.1
LYH140-9	0.49	0.021	0.06401	0.00085	0.01934	0.00065	0.0569	0.0026	402	14	399.9	5.1	387	13	450	95	0.5	399.9	5.1
LYH140-106	0.49	0.017	0.06426	0.00073	0.0197	0.00051	0.0554	0.0019	404	12	401.4	4.5	395	10	414	74	0.6	401.4	4.5
LYH140-21	0.494	0.036	0.065	0.0015	0.0212	0.0021	0.0564	0.0043	406	25	406	9	422	41	400	150	0	406	9
LYH140-101	0.501	0.013	0.06559	0.00078	0.01933	0.00044	0.0556	0.0014	411.9	8.6	409.5	4.7	387.8	8.8	420	53	0.6	409.5	4.7
LYH140-2	0.511	0.037	0.0662	0.0012	0.02132	0.00094	0.0564	0.004	416	25	413.4	7.5	426	19	410	150	0.6	413.4	7.5
LYH140-110	0.503	0.013	0.06691	0.0007	0.02024	0.00047	0.0546	0.0014	414.4	8.7	417.4	4.2	405	9.4	386	54	0.7	417.4	4.2
LYH140-77	0.5	0.021	0.0669	0.0012	0.02089	0.00076	0.0545	0.0024	413	14	417.5	7.2	418	15	364	93	1.1	417.5	7.2
LYH140-111	0.508	0.012	0.06723	0.00065	0.01805	0.00073	0.0546	0.0012	417.2	7.8	419.4	3.9	361	14	396	47	0.5	419.4	3.9
LYH140-15	0.518	0.036	0.068	0.0019	0.0235	0.0013	0.0597	0.0044	427	22	424	12	469	26	570	160	0.7	424	12
LYH140-69	0.523	0.028	0.0683	0.0017	0.01774	0.0009	0.0547	0.0028	426	19	426	11	355	18	400	120	0	426	11
LYH140-118	0.522	0.02	0.06864	0.00081	0.045	0.011	0.0553	0.0023	429	13	427.9	4.9	860	210	390	89	0.3	427.9	4.9
LYH140-120	0.531	0.019	0.06884	0.00098	0.02114	0.00064	0.0559	0.0019	431	13	429.1	5.9	423	13	427	76	0.4	429.1	5.9
LYH140-66	0.536	0.023	0.0692	0.0011	0.0215	0.00079	0.0564	0.0024	435	16	431.4	6.9	430	16	446	89	0.8	431.4	6.9
LYH140-55	0.54	0.023	0.06964	0.00083	0.02237	0.00065	0.0562	0.0025	435	15	433.9	5	447	13	431	88	0.3	433.9	5
LYH140-85	0.542	0.021	0.06992	0.00089	0.02095	0.00066	0.0564	0.002	436	14	435.6	5.4	419	13	423	75	0.1	435.6	5.4
LYH140-73	0.537	0.015	0.07022	0.00068	0.02299	0.00042	0.0553	0.0015	435.6	9.7	437.4	4.1	459.4	8.4	408	57	0.4	437.4	4.1
LYH140-29	0.547	0.038	0.0703	0.0018	0.0208	0.0012	0.0557	0.004	439	25	438	11	416	23	420	150	0.2	438	11
LYH140-109	0.542	0.026	0.0704	0.0011	0.0231	0.001	0.0557	0.0026	437	17	438.2	6.8	461	20	430	100	0.3	438.2	6.8
LYH140-10	0.546	0.021	0.0704	0.0011	0.02234	0.00069	0.0574	0.0023	442	14	438.4	6.8	446	14	514	91	0.8	438.4	6.8
LYH140-61	0.547	0.017	0.07067	0.00085	0.02358	0.0006	0.0562	0.0018	442	11	440.1	5.1	471	12	428	68	0.4	440.1	5.1
LYH140-40	0.547	0.024	0.07068	0.00099	0.02373	0.00076	0.0557	0.0024	441	16	440.2	5.9	475	15	403	88	0.2	440.2	5.9
LYH140-49	0.548	0.02	0.0708	0.0011	0.02269	0.00077	0.0553	0.002	444	14	441	6.5	453	15	402	77	0.7	441	6.5
LYH140-1	0.556	0.027	0.0711	0.001	0.02268	0.00083	0.0576	0.003	444	17	442.6	6.1	453	16	480	110	0.3	442.6	6.1
LYH140-95	0.558	0.037	0.0711	0.0013	0.02102	0.00084	0.056	0.0038	445	25	442.8	7.9	420	17	420	140	0.5	442.8	7.9
LYH140-30	0.54	0.029	0.0715	0.0012	0.02455	0.00096	0.0551	0.003	444	20	445	7.2	490	19	390	110	0.2	445	7.2
LYH140-75	0.553	0.018	0.0715	0.0011	0.02506	0.00098	0.0559	0.0018	446	12	445.1	6.5	500	19	421	70	0.2	445.1	6.5
LYH140-35	0.557	0.021	0.07157	0.00082	0.0217	0.00053	0.0561	0.0019	447	14	445.6	4.9	434	11	428	75	0.3	445.6	4.9
LYH140-47	0.557	0.018	0.07184	0.0008	0.02399	0.00058	0.0558	0.0018	450	12	447.2	4.8	479	11	440	69	0.6	447.2	4.8
LYH140-18	0.558	0.016	0.07186	0.00087	0.02479	0.00066	0.0565	0.0016	451	10	447.3	5.3	495	13	475	62	0.8	447.3	5.3
LYH140-98	0.565	0.036	0.0722	0.0018	0.02242	0.00099	0.0564	0.0036	452	23	449	11	448	20	410	130	0.7	449	11
LYH140-38	0.552	0.039	0.0725	0.002	0.0229	0.0016	0.055	0.0043	451	27	451	12	457	32	380	150	0	451	12
LYH140-103	0.549	0.054	0.0728	0.0028	0.0216	0.0013	0.0559	0.0054	453	39	453	17	432	27	420	210	0	453	17
LYH140-81	0.565	0.034	0.0729	0.0016	0.0234	0.001	0.0565	0.0032	450	22	453.6	9.9	469	20	410	120	0.8	453.6	9.9
LYH140-93	0.573	0.019	0.0732	0.0011	0.02269	0.0006	0.0578	0.0019	459	12	455.1	6.5	453	12	490	73	0.9	455.1	6.5
LYH140-96	0.583	0.055	0.0735	0.0023	0.0218	0.0021	0.0568	0.0053	457	36	457	14	436	41	390	190	0	457	14
LYH140-91	0.566	0.023	0.0736	0.0011	0.02225	0.00071	0.0563	0.0024	456	15	457.9	6.8	445	14	430	86	0.4	457.9	6.8
LYH140-22	0.572	0.031	0.0737	0.0012	0.0227	0.0013	0.0561	0.0031	456	21	458.9	7.3	455	26	410	110	0.6	458.9	7.3
LYH140-17	0.576	0.016	0.07382	0.00084	0.02381	0.00077	0.0578	0.0016	462	10	459	5	475	15	495	60	0.7	459	5
LYH140-62	0.582	0.031	0.0746	0.0012	0.0244	0.0012	0.0556	0.0029	462	20	463.9	7.1	488	23	410	110	0.4	463.9	7.1
LYH140-51	0.588	0.031	0.0748	0.0013	0.02361	0.00091	0.0577	0.0028	467	19	465.1	7.9	472	18	470	100	0.4	465.1	7.9
LYH140-16	0.597	0.029	0.0763	0.0012	0.02551	0.00094	0.0585	0.0029	475	19	474	7.5	511	19	510	100	0.2	474	7.5
LYH140-94	0.602	0.022	0.07695	0.00092	0.02088	0.00063	0.0566	0.0019	476	14	477.8	5.5	417	12	459	72	0.4	477.8	5.5
LYH140-104	0.631	0.025	0.08	0.001	0.0253	0.0012	0.0574	0.0023	495	15	495.9	5.9	505	23	497	85	0.2	495.9	5.9
LYH140-50	0.638	0.038	0.0801	0.003	0.0393	0.0049	0.0577	0.0049	500	24	496	18	778	96	560	220	0.8	496	18
LYH140-114	0.79	0.04	0.0957	0.0016	0.0409	0.0019	0.0595	0.003	591	22	589	9.2	809	38	562	98	0.3	589	9.2
LYH140-117	1.094	0.041	0.1241	0.0018	0.0399	0.0011	0.0631	0.0023	752	20	754	10	791	22	696	81	0.3	754	10
LYH140-42	1.124	0.089	0.1269	0.003	0.0414	0.0044	0.0669	0.0053	774	47	770	17	819	85	800	180	0.5	770	17
LYH140-63	1.219	0.029	0.1334	0.0015	0.0452	0.0012	0.0664	0.0015	807	13	806.7	8.3	892	22	825	45	0	806.7	8.3
LYH140-68	1.326	0.098	0.141	0.0047	0.0448	0.005	0.0678	0.0055	850	43	850	27	884	97	790	170	0	850	27
LYH140-45	1.35	0.04	0.1432	0.0014	0.047	0.0023	0.0676	0.0021	866	17	863.3	7.8	927	44	847	64	0.3	863.3	7.8
LYH140-113	1.349	0.028	0.1441	0.0017	0.0468	0.0012	0.0676	0.0012	869	12	868.3	9.6	924	22	853	38	0.1	868.3	9.6
LYH140-121	1.408	0.047	0.1478	0.0019	0.0479	0.0015	0.0694	0.0023	891	20	889	11	945	29	864	73	0.2	889	11
LYH140-53	1.464	0.066	0.152	0.0023	0.0451	0.0017	0.0703	0.0031	910	27	912	13	892	33	921	86	0.2	912	13
LYH140-19	1.5	0.12	0.154	0.004	0.0558	0.0046	0.0694	0.0074	927	51	923	22	1097	89	910	200	0.4	923	22
LYH140-33	1.555	0.032	0.1589	0.0017	0.0514	0.0013	0.0708	0.0016	951	13	951	9.3	1012	26	951	45	0	951	9.3
LYH140-58	1.61	0.11	0.1628	0.0039	0.0541	0.0031	0.0725	0.0049	972	42	972	22	1065	59	1040	130	0	972	22
LYH140-65	1.656	0.059	0.1666	0.0021	0.0541	0.0015	0.072	0.0026	992	22	993	12	1070	30	970	73	0.1	993	12
LYH140-52	1.723	0.07	0.1709	0.0024	0.0506	0.0018	0.0724	0.0028	1017	27	1017	13	997	34	991	80	0	1017	13
LYH140-82	1.79	0.14	0.1741	0.0071	0.0469	0.0026	0.0745	0.0036	1036	52	1034	39	927	50	1040	98	0.2	1034	39
LYH140-97	2.23	0.049	0.2016	0.0022	0.0597	0.0022	0.08	0.0017	1187	16	1184	12	1173	42	1211	41	0.3	1184	12
LYH140-87	2.227	0.08	0.2034	0.0042	0.0544	0.0025	0.0802	0.0029	1191	26	1193	22	1070	48	1182	73	0.2	1193	22
LYH140-115	2.51	0.13	0.2175	0.0049	0.0665	0.0093	0.0841	0.0044	1271	38	1268	26	1300	180	1320	100	0.2	1268	26
LYH140-32	2.65	0.16	0.226	0.0056	0.0768	0.0097	0.0862	0.005	1312	44	1313	29	1490	180	1330	110	0.1	1313	29
LYH140-102	2.814	0.051	0.2341	0.0022	0.0688	0.0015	0.0874	0.0016	1359	14	1357	12	1343	28	1376	36	0.1	1357	12
LYH140-26	3.47	0.86	0.262	0.024	0.075	0.011	0.095	0.019	1500	210	1500	120	1470	200	1470	400	0	1500	120
LYH140-108	3.52	0.12	0.2678	0.0094	0.0792	0.0058	0.0974	0.0054	1531	27	1529	48	1540	110	1570	100	0.1	1529	48
LYH140-14	3.7	0.12	0.2759	0.0086	0.0742	0.0035	0.1019	0.0049	1569	25	1570	43	1447	65	1651	87	0.1	1570	43
LYH140-84	4.51	0.41	0.305	0.011	0.0875	0.0089	0.108	0.011	1716	76	1715	53	1690	170	1700	180	0.1	1715	53
LYH140-3	4.53	0.57	0.308	0.022	0.09	0.016	0.102	0.014	1730	110	1730	110	1750	300	1720	310	0	1730	110
LYH140-13	4.627	0.097	0.3121	0.0037	0.099	0.0025	0.1094	0.0025	1753	17	1750	18	1907	45	1784	43	0.2	1750	18
LYH140-59	4.86	0.17	0.3195	0.0056	0.1003	0.0044	0.1112	0.0042	1787	31	1786	27	1930	81	1852	63	0.1	1786	27
LYH140-7	4.94	0.2	0.3224	0.0056	0.0972	0.0027	0.1145	0.0051	1801	35	1801	27	1882	47	1842	83	0	1801	27
LYH140-60	5.12	0.12	0.329	0.0038	0.1015	0.0024	0.1134	0.0025	1836	20	1832	18	1951	44	1842	39	0.2	1832	18
LYH140-56	5.55	0.15	0.3448	0.0068	0.1048	0.0048	0.1171	0.0032	1913	24	1912	32	2010	88	1905	51	0.1	1912	32
LYH140-99	5.74	0.46	0.3495	0.0093	0.0948	0.0073	0.1165	0.0068	1931	67	1932	44	1830	130	1890	110	0.1	1932	44
LYH140-107	5.8	0.52	0.352	0.017	0.0607	0.0037	0.1193	0.0069	1942	78	1941	79	1192	69	1940	100	0.1	1941	79
LYH140-31	5.73	0.13	0.3516	0.0053	0.1069	0.0041	0.118	0.0025	1941	19	1943	25	2053	75	1925	39	0.1	1943	25
LYH140-76	7.3	0.11	0.3964	0.0043	0.118	0.0026	0.1328	0.0019	2147	14	2152	20	2253	48	2133	25	0.2	2152	20
LYH140-64	8.4	0.29	0.423	0.007	0.1474	0.0042	0.1419	0.0044	2274	31	2278	32	2774	74	2252	53	0.2	2278	32
LYH140-34	10.31	0.77	0.464	0.019	0.1134	0.0082	0.1576	0.007	2457	70	2457	81	2170	150	2426	74	0	2457	81
LYH140-12	10.8	0.14	0.476	0.004	0.1417	0.0022	0.1681	0.002	2507	12	2509	17	2676	38	2536	20	0.1	2509	17
LYH140-79	10.78	0.17	0.4785	0.005	0.1364	0.0026	0.1647	0.0022	2516	14	2519	22	2586	47	2506	22	0.1	2519	22
LYH141-106	0.201	0.015	0.02845	0.00061	0.0096	0.00043	0.0514	0.004	182	13	180.8	3.8	193	8.7	230	140	0.7	180.8	3.8
LYH141-36	0.21	0.021	0.02999	0.00078	0.0115	0.00092	0.0499	0.0049	193	18	190.4	4.9	231	18	200	180	1.4	190.4	4.9
LYH141-119	0.219	0.024	0.03	0.0012	0.0098	0.0011	0.05	0.0048	194	19	190.4	7.8	197	21	170	170	1.9	190.4	7.8
LYH141-81	0.212	0.018	0.03091	0.00087	0.01036	0.00048	0.0495	0.0043	195	15	196.2	5.5	208.3	9.5	150	160	0.6	196.2	5.5
LYH141-105	0.215	0.01	0.03091	0.00044	0.01035	0.00038	0.0506	0.0024	196.3	8.6	196.2	2.8	208.1	7.7	211	91	0.1	196.2	2.8
LYH141-9	0.2154	0.009	0.03125	0.00058	0.01035	0.00038	0.0497	0.002	198.2	7.5	198.3	3.6	208	7.6	191	77	0.1	198.3	3.6
LYH141-116	0.2259	0.0075	0.03219	0.00043	0.01112	0.0003	0.0504	0.0018	206.5	6.2	204.2	2.7	223.5	6	217	72	1.1	204.2	2.7
LYH141-31	0.2275	0.0091	0.03223	0.00043	0.01061	0.00029	0.0504	0.0021	206.9	7.5	204.4	2.7	213.3	5.7	222	82	1.2	204.4	2.7
LYH141-78	0.238	0.019	0.03304	0.00074	0.01039	0.00055	0.051	0.0039	208	15	209.5	4.6	209	11	160	130	0.7	209.5	4.6
LYH141-121	0.2333	0.0099	0.03304	0.00055	0.01063	0.00044	0.0516	0.0023	213.2	8.2	209.5	3.4	213.7	8.7	257	83	1.8	209.5	3.4
LYH141-108	0.236	0.012	0.03309	0.00059	0.0107	0.0005	0.0513	0.0026	213.8	9.7	209.8	3.7	215	10	230	100	1.9	209.8	3.7
LYH141-30	0.245	0.037	0.0332	0.0013	0.0143	0.0017	0.0529	0.0083	208	30	210.4	8.1	286	33	110	260	1.1	210.4	8.1
LYH141-29	0.238	0.015	0.0336	0.00063	0.01124	0.00047	0.0516	0.0032	216	12	213	3.9	225.9	9.4	230	120	1.4	213	3.9
LYH141-84	0.2309	0.009	0.03376	0.00047	0.01129	0.00059	0.0501	0.002	210.2	7.4	214	2.9	227	12	195	81	1.8	214	2.9
LYH141-17	0.239	0.011	0.0341	0.00055	0.01131	0.00051	0.0496	0.0022	217.7	8.5	216.1	3.4	227	10	215	87	0.7	216.1	3.4
LYH141-34	0.235	0.013	0.03426	0.00059	0.01135	0.00043	0.0491	0.0028	215	11	217.2	3.7	228.1	8.6	170	110	1	217.2	3.7
LYH141-95	0.245	0.01	0.03437	0.0004	0.01176	0.00038	0.0516	0.0022	221.7	8.4	217.9	2.5	236.3	7.6	245	85	1.7	217.9	2.5
LYH141-41	0.2445	0.0073	0.03449	0.00043	0.01147	0.00031	0.0514	0.0016	221.8	5.9	218.6	2.7	230.4	6.2	241	62	1.5	218.6	2.7
LYH141-32	0.237	0.013	0.03463	0.00061	0.01188	0.00054	0.0493	0.0027	216	11	219.4	3.8	239	11	170	100	1.5	219.4	3.8
LYH141-82	0.25	0.014	0.03485	0.00068	0.01181	0.00049	0.0527	0.003	223	11	220.7	4.2	237.3	9.8	240	100	1	220.7	4.2
LYH141-67	0.249	0.015	0.03535	0.00067	0.01171	0.00056	0.0507	0.0032	227	12	223.9	4.1	235	11	270	130	1.4	223.9	4.1
LYH141-91	0.247	0.01	0.03552	0.0006	0.01169	0.00038	0.0502	0.0021	222.6	8.4	224.9	3.7	234.9	7.7	204	83	1	224.9	3.7
LYH141-47	0.2487	0.0073	0.03566	0.00049	0.01197	0.0003	0.0506	0.0014	224.8	6	225.8	3	240.5	6	218	55	0.4	225.8	3
LYH141-114	0.2627	0.009	0.0367	0.00051	0.01366	0.00039	0.0516	0.0018	235.8	7.3	232.3	3.2	274.2	7.8	271	73	1.5	232.3	3.2
LYH141-71	0.274	0.031	0.0374	0.0012	0.01127	0.00099	0.0525	0.0057	236	24	236.5	7.5	226	20	150	190	0.2	236.5	7.5
LYH141-87	0.258	0.053	0.0378	0.0018	0.0139	0.0014	0.052	0.01	237	44	239	11	279	28	130	330	0.8	239	11
LYH141-62	0.286	0.018	0.04016	0.0007	0.01329	0.00073	0.0517	0.0032	254	14	253.8	4.3	267	15	240	130	0.1	253.8	4.3
LYH141-102	0.327	0.021	0.04447	0.0008	0.0148	0.00073	0.0546	0.0037	283	16	280.9	4.9	297	15	290	130	0.7	280.9	4.9
LYH141-59	0.378	0.038	0.0488	0.0012	0.0172	0.0011	0.055	0.0051	304	24	307.3	7.3	344	22	190	150	1.1	307.3	7.3
LYH141-45	0.359	0.013	0.04885	0.00072	0.01628	0.00042	0.0531	0.002	310.7	9.9	307.8	4.4	326.2	8.3	321	75	0.9	307.8	4.4
LYH141-79	0.39	0.03	0.0523	0.0013	0.01801	0.00099	0.0542	0.0043	330	21	328.4	7.9	360	20	340	150	0.5	328.4	7.9
LYH141-33	0.437	0.017	0.0584	0.001	0.01954	0.0007	0.055	0.002	367	12	365.8	6.3	391	14	390	79	0.3	365.8	6.3
LYH141-89	0.444	0.051	0.0603	0.0018	0.0182	0.002	0.053	0.0062	376	34	377	11	365	40	330	240	0.3	377	11
LYH141-27	0.455	0.033	0.0604	0.0026	0.0218	0.0016	0.0542	0.0043	380	23	378	16	435	31	340	160	0.5	378	16
LYH141-113	0.458	0.035	0.061	0.0014	0.0179	0.0023	0.0554	0.0042	380	24	381.9	8.5	357	45	380	160	0.5	381.9	8.5
LYH141-74	0.506	0.022	0.0658	0.0013	0.02118	0.00085	0.0563	0.0024	413	15	410.6	8.1	423	17	430	90	0.6	410.6	8.1
LYH141-23	0.506	0.032	0.0668	0.0012	0.0248	0.0018	0.0549	0.0036	419	21	417.8	7.1	495	35	390	130	0.3	417.8	7.1
LYH141-109	0.511	0.027	0.0676	0.0012	0.0226	0.001	0.055	0.003	421	18	421.6	7.4	452	20	370	110	0.1	421.6	7.4
LYH141-88	0.525	0.032	0.0678	0.0012	0.0217	0.0014	0.0559	0.0034	427	21	422.5	7.1	434	27	440	120	1.1	422.5	7.1
LYH141-115	0.523	0.019	0.0678	0.0013	0.02215	0.00086	0.0562	0.002	426	13	423.7	7.9	443	17	440	79	0.5	423.7	7.9
LYH141-83	0.524	0.031	0.0683	0.0014	0.02195	0.00091	0.056	0.0032	427	20	425.6	8.4	439	18	400	110	0.3	425.6	8.4
LYH141-92	0.517	0.018	0.06838	0.00099	0.02276	0.00061	0.0548	0.0019	427	12	426.3	5.9	455	12	367	73	0.2	426.3	5.9
LYH141-111	0.534	0.028	0.0689	0.0016	0.02434	0.00096	0.0566	0.0032	432	19	429.2	9.5	486	19	440	120	0.7	429.2	9.5
LYH141-103	0.539	0.027	0.069	0.0011	0.0225	0.00096	0.0568	0.0028	431	17	430	6.4	451	19	411	95	0.2	430	6.4
LYH141-100	0.542	0.026	0.0697	0.0013	0.02395	0.00085	0.0558	0.0027	437	17	434	8.1	478	17	410	100	0.7	434	8.1
LYH141-13	0.528	0.016	0.0697	0.00083	0.02326	0.00053	0.0559	0.0017	430	10	434.2	5	465	10	443	64	1	434.2	5
LYH141-8	0.545	0.021	0.07004	0.00085	0.02332	0.00085	0.0569	0.0023	441	14	436.9	5.2	466	17	450	86	0.9	436.9	5.2
LYH141-4	0.533	0.023	0.0703	0.0012	0.0246	0.0011	0.055	0.0025	435	16	437.6	7.1	491	22	411	95	0.6	437.6	7.1
LYH141-11	0.536	0.025	0.0706	0.001	0.02393	0.00072	0.0553	0.0027	436	17	439.5	6.2	478	14	383	97	0.8	439.5	6.2
LYH141-28	0.541	0.015	0.07072	0.00078	0.02331	0.00049	0.0557	0.0014	437	9.6	440.4	4.7	465.6	9.6	426	55	0.8	440.4	4.7
LYH141-86	0.542	0.021	0.0708	0.00091	0.02339	0.00066	0.0565	0.0022	439	14	440.9	5.5	467	13	440	83	0.4	440.9	5.5
LYH141-72	0.56	0.034	0.071	0.0022	0.0229	0.0015	0.0573	0.0033	443	21	442	13	457	30	450	120	0.2	442	13
LYH141-42	0.55	0.015	0.07118	0.0007	0.02412	0.00044	0.0557	0.0014	443.8	9.5	443.2	4.2	481.7	8.6	424	55	0.1	443.2	4.2
LYH141-69	0.551	0.022	0.0711	0.0011	0.02497	0.00095	0.0561	0.0023	444	14	443.2	6.4	500	19	445	83	0.2	443.2	6.4
LYH141-35	0.549	0.032	0.0712	0.0012	0.02376	0.00098	0.0555	0.0032	443	21	443.5	7.4	474	19	390	120	0.1	443.5	7.4
LYH141-16	0.54	0.024	0.0713	0.0018	0.0236	0.00096	0.0552	0.0022	443	15	444	11	471	19	397	89	0.2	444	11
LYH141-93	0.557	0.059	0.0715	0.0021	0.04	0.016	0.058	0.0065	444	39	445	13	780	300	490	230	0.2	445	13
LYH141-22	0.57	0.1	0.0717	0.0048	0.0269	0.003	0.057	0.01	445	63	446	29	537	60	470	300	0.2	446	29
LYH141-14	0.556	0.018	0.07174	0.00099	0.02464	0.00065	0.0565	0.0018	450	12	446.5	6	492	13	462	69	0.8	446.5	6
LYH141-96	0.558	0.021	0.0717	0.001	0.02377	0.00066	0.0571	0.0021	450	13	446.6	6.1	475	13	481	75	0.8	446.6	6.1
LYH141-112	0.56	0.018	0.07204	0.00097	0.02425	0.00085	0.0564	0.0017	451	12	448.3	5.8	484	17	448	67	0.6	448.3	5.8
LYH141-46	0.564	0.032	0.072	0.0012	0.024	0.0012	0.0568	0.0033	451	20	449	7.2	481	24	460	120	0.4	449	7.2
LYH141-1	0.559	0.026	0.0722	0.0011	0.0239	0.00078	0.0564	0.0024	448	16	449.3	6.5	477	15	458	89	0.3	449.3	6.5
LYH141-63	0.577	0.053	0.0728	0.002	0.0267	0.0022	0.058	0.0056	456	35	453	12	532	43	470	200	0.7	453	12
LYH141-6	0.579	0.028	0.0732	0.001	0.0244	0.0038	0.0575	0.0027	461	18	455.1	6.2	485	74	510	110	1.3	455.1	6.2
LYH141-97	0.583	0.07	0.0733	0.0028	0.0252	0.0027	0.0594	0.0072	459	46	456	17	503	53	540	260	0.7	456	17
LYH141-75	0.567	0.015	0.0734	0.00095	0.02511	0.00063	0.0559	0.0015	455.8	9.8	456.5	5.7	501	12	444	61	0.2	456.5	5.7
LYH141-7	0.574	0.034	0.0735	0.0015	0.0236	0.0011	0.0561	0.0035	457	23	456.9	9.1	471	22	430	130	0	456.9	9.1
LYH141-20	0.6	0.13	0.0736	0.0036	0.026	0.0032	0.058	0.011	467	81	458	21	518	63	440	390	2	458	21
LYH141-24	0.576	0.022	0.074	0.0011	0.02326	0.00079	0.056	0.0023	459	14	460	6.7	465	16	416	87	0.2	460	6.7
LYH141-51	0.584	0.026	0.0742	0.001	0.02381	0.00067	0.0574	0.0026	464	16	461.4	6.2	475	13	464	89	0.6	461.4	6.2
LYH141-61	0.585	0.03	0.0753	0.0013	0.0278	0.0016	0.0569	0.0029	468	19	468	7.6	553	31	460	110	0	468	7.6
LYH141-64	0.597	0.027	0.076	0.0014	0.025	0.0013	0.0577	0.0026	474	17	471.7	8.2	498	25	468	95	0.5	471.7	8.2
LYH141-60	0.598	0.027	0.0764	0.0018	0.02513	0.00072	0.056	0.0025	468	16	472.2	9.9	501	14	400	88	0.9	472.2	9.9
LYH141-55	0.604	0.042	0.0772	0.0018	0.0246	0.0015	0.0571	0.0041	478	27	479	11	491	29	430	140	0.2	479	11
LYH141-118	1.065	0.053	0.1203	0.0019	0.0384	0.0018	0.0636	0.0031	737	26	732	11	760	35	710	100	0.7	732	11
LYH141-117	1.162	0.09	0.1272	0.0027	0.0426	0.0028	0.0663	0.0048	776	42	772	15	843	53	750	150	0.5	772	15
LYH141-70	1.215	0.066	0.134	0.0031	0.0417	0.0045	0.0669	0.0035	804	31	811	18	824	87	850	110	0.9	811	18
LYH141-19	1.405	0.069	0.1472	0.0028	0.0496	0.0028	0.069	0.0033	882	30	884	15	976	54	880	100	0.2	884	15
LYH141-104	1.462	0.072	0.1508	0.0031	0.0478	0.0038	0.0705	0.0032	911	29	905	18	943	74	937	89	0.7	905	18
LYH141-15	1.483	0.04	0.1536	0.002	0.0512	0.0017	0.0697	0.0019	924	17	921	11	1008	33	907	56	0.3	921	11
LYH141-58	1.497	0.092	0.1541	0.0032	0.0528	0.0024	0.0703	0.0044	924	37	924	18	1039	46	930	120	0	924	18
LYH141-73	1.487	0.028	0.1543	0.0021	0.0492	0.0018	0.0698	0.0014	923	12	925	12	973	36	924	42	0.2	925	12
LYH141-110	1.519	0.046	0.1557	0.0018	0.0501	0.0019	0.0709	0.0021	938	19	933.6	9.8	986	37	971	57	0.5	933.6	9.8
LYH141-2	1.553	0.069	0.1576	0.0026	0.0527	0.0016	0.0713	0.0031	945	27	945	14	1037	30	934	89	0	945	14
LYH141-80	1.559	0.05	0.1581	0.0025	0.0602	0.002	0.0718	0.002	950	20	946	14	1184	37	968	58	0.4	946	14
LYH141-5	1.594	0.065	0.1622	0.0025	0.0548	0.0018	0.0705	0.003	969	26	969	14	1078	35	910	87	0	969	14
LYH141-38	2.11	0.058	0.1948	0.0028	0.0612	0.0019	0.0781	0.002	1151	19	1147	15	1200	35	1147	49	0.3	1147	15
LYH141-90	2.66	0.16	0.2242	0.0058	0.0754	0.005	0.0862	0.005	1305	43	1302	31	1477	96	1340	110	0.2	1302	31
LYH141-77	3	0.33	0.239	0.012	0.098	0.014	0.0954	0.009	1381	88	1391	68	1870	250	1490	190	0.7	1391	68
LYH141-25	3.007	0.062	0.2431	0.0027	0.0801	0.0019	0.0894	0.0019	1404	15	1402	14	1557	36	1403	37	0.1	1402	14
LYH141-3	3.18	0.18	0.2514	0.006	0.0847	0.0043	0.0922	0.0058	1448	46	1450	32	1642	80	1420	130	0.1	1450	32
LYH141-40	3.78	0.47	0.279	0.015	0.0858	0.0084	0.098	0.016	1582	96	1588	74	1660	160	1560	280	0.4	1588	74
LYH141-49	4.38	0.16	0.3002	0.0086	0.1004	0.0033	0.1059	0.0024	1703	30	1696	42	1937	61	1725	43	0.4	1696	42
LYH141-65	4.39	0.36	0.303	0.028	0.101	0.012	0.107	0.012	1705	66	1700	140	1950	210	1720	220	0.3	1700	140
LYH141-56	4.54	0.33	0.309	0.013	0.0915	0.0095	0.1058	0.0082	1723	58	1732	63	1760	170	1740	140	0.5	1732	63
LYH141-10	4.67	0.22	0.3115	0.0061	0.1011	0.0054	0.1106	0.0047	1747	39	1749	31	1945	98	1755	76	0.1	1749	31
LYH141-101	4.87	0.56	0.316	0.011	0.105	0.011	0.111	0.011	1780	97	1770	52	2010	200	1780	200	0.6	1770	52
LYH141-53	4.833	0.085	0.3196	0.0036	0.1026	0.0033	0.1108	0.0021	1790	15	1788	17	1975	59	1805	34	0.1	1788	17
LYH141-54	5.25	0.16	0.3346	0.0061	0.104	0.0038	0.1125	0.0032	1856	26	1859	30	1997	70	1837	51	0.2	1859	30
LYH141-44	5.474	0.093	0.3421	0.0036	0.1068	0.0028	0.1161	0.0017	1895	15	1896	17	2053	52	1896	26	0.1	1896	17
LYH141-21	5.63	0.11	0.3472	0.0047	0.1114	0.0045	0.1165	0.0027	1916	17	1920	23	2131	81	1903	41	0.2	1920	23
LYH141-76	5.75	0.14	0.3523	0.0047	0.1097	0.0034	0.1174	0.0029	1940	21	1944	23	2101	63	1910	44	0.2	1944	23
LYH141-107	5.76	0.13	0.3531	0.0044	0.1051	0.003	0.1201	0.0024	1947	20	1948	21	2016	55	1944	37	0.1	1948	21
LYH141-26	6.26	0.13	0.3668	0.005	0.1127	0.0027	0.1213	0.0023	2012	19	2014	24	2158	49	1978	35	0.1	2014	24
LYH141-50	7.45	0.15	0.3997	0.0061	0.1242	0.0032	0.1332	0.0021	2165	18	2166	28	2363	58	2135	27	0	2166	28
LYH141-48	7.82	0.11	0.4095	0.0045	0.1286	0.003	0.1388	0.0018	2210	14	2211	21	2443	54	2211	22	0	2211	21
LYH141-37	8.14	0.19	0.4159	0.0064	0.1271	0.0031	0.1428	0.0022	2241	21	2242	29	2421	56	2262	27	0	2242	29
LYH141-98	9.34	0.49	0.4392	0.0089	0.1296	0.0065	0.1541	0.0074	2356	50	2346	40	2460	120	2400	82	0.4	2346	40
LYH141-18	10.46	0.12	0.4692	0.0043	0.1401	0.0045	0.1622	0.0016	2478	11	2479	19	2659	81	2479	17	0	2479	19
LYH141-120	10.8	1.3	0.469	0.024	0.154	0.015	0.165	0.017	2490	120	2480	110	2890	260	2540	160	0.4	2480	110
LYH141-12	11.24	0.4	0.4816	0.0093	0.1522	0.0063	0.1668	0.0049	2540	34	2534	40	2860	110	2534	54	0.2	2534	40
LYH141-94	11.43	0.4	0.4841	0.0067	0.1433	0.0053	0.1729	0.0057	2550	34	2550	29	2705	92	2569	57	0	2550	29
LYH141-57	11.62	0.22	0.4918	0.0071	0.1499	0.0042	0.1708	0.0029	2574	18	2576	31	2827	75	2564	28	0.1	2576	31
LYH141-39	15.22	0.25	0.5522	0.0076	0.1618	0.0039	0.1998	0.0027	2833	15	2832	32	3034	67	2826	22	0	2832	32

## Sheet: Sheet2
143.2	1.5
151	1.9
159.9	7.9
180.8	3.8
190.1	2.1
190.4	4.9
190.4	7.8
196.2	5.5
196.2	2.8
196.9	6
198.3	3.6
199.8	3.1
200.9	3.4
201.6	2.5
202	16
204.2	2.7
204.4	2.7
206.8	4.1
207.3	2.9
208	1.9
209.5	4.6
209.5	3.4
209.8	3.7
210.1	3.2
210.4	8.1
213	3.9
214	2.9
214.2	3
214.2	3.2
215.8	2.2
216.1	3.4
217.2	3.7
217.9	2.5
218.6	2.7
219.4	3.8
220.7	4.2
220.8	2.5
223.9	4.1
224.2	2.5
224.9	3.7
225.8	3
232.3	3.2
236.5	7.5
239	11
251	4.5
253.8	4.3
255.2	3.2
275.4	3.9
277.2	6.6
280.5	6.8
280.9	4.9
287.7	4.3
291	7.9
307.3	7.3
307.8	4.4
328.4	7.9
349	11
365.8	6.3
377	11
377.4	6.3
378	16
381.9	8.5
386.8	6.1
391.4	6.1
399.9	5.1
401.4	4.5
406	9
409.5	4.7
410.6	8.1
413.4	7.5
417.4	4.2
417.5	7.2
417.8	7.1
419.4	3.9
421.6	7.4
422.5	7.1
423.7	7.9
424	12
425.6	8.4
426	11
426.3	5.9
427.9	4.9
429.1	5.9
429.2	9.5
430	6.4
431.4	6.9
433.9	5
434	8.1
434.2	5
435.6	5.4
436.9	5.2
437.4	4.1
437.6	7.1
438	11
438.2	6.8
438.4	6.8
439.5	6.2
440.1	5.1
440.2	5.9
440.4	4.7
440.9	5.5
441	6.5
442	13
442.6	6.1
442.8	7.9
443.2	4.2
443.2	6.4
443.5	7.4
444	11
445	7.2
445	13
445.1	6.5
445.6	4.9
446	29
446.5	6
446.6	6.1
447.2	4.8
447.3	5.3
448.3	5.8
449	11
449	7.2
449.3	6.5
451	12
453	17
453	12
453.6	9.9
455.1	6.5
455.1	6.2
456	17
456.5	5.7
456.9	9.1
457	14
457.9	6.8
458	21
458.9	7.3
459	5
460	6.7
461.4	6.2
463.9	7.1
465.1	7.9
468	7.6
471.7	8.2
472.2	9.9
474	7.5
477.8	5.5
479	11
495.9	5.9
496	18
589	9.2
732	11
754	10
770	17
772	15
806.7	8.3
811	18
850	27
863.3	7.8
868.3	9.6
884	15
889	11
905	18
912	13
921	11
923	22
924	18
925	12
933.6	9.8
945	14
946	14
951	9.3
969	14
972	22
993	12
1017	13
1034	39
1147	15
1184	12
1193	22
1268	26
1302	31
1313	29
1357	12
1391	68
1402	14
1450	32
1500	120
1529	48
1570	43
1588	74
1696	42
1700	140
1715	53
1730	110
1732	63
1749	31
1750	18
1770	52
1786	27
1788	17
1801	27
1832	18
1859	30
1896	17
1912	32
1920	23
1932	44
1941	79
1943	25
1944	23
1948	21
2014	24
2152	20
2166	28
2211	21
2242	29
2278	32
2346	40
2457	81
2479	19
2480	110
2509	17
2519	22
2534	40
2550	29
2576	31
2832	32

## Sheet: Sample5
Analysis	Ratios								Ages								Discordance (%)	Best Age (Ma)
	207Pb/235U		206Pb/238U		208Pb/232Th		207Pb/206Pb		207Pb/235U		206Pb/238U		208Pb/232Th		207Pb/206Pb
		2 s.e.		2 s.e.		2 s.e.		2 s.e.		2 s.e.		2 s.e.		2 s.e.		2 s.e.			2 s.e.
LYH196-113	0.1523	0.0053	0.02193	0.00021	0.00652	0.00019	0.0503	0.0018	143.6	4.6	139.8	1.3	131.3	3.8	194	71	2.7	139.8	1.3
LYH196-30	0.26	0.028	0.0369	0.0011	0.0135	0.0016	0.0502	0.0059	233	23	233.5	6.6	272	32	220	240	0.2	233.5	6.6
LYH196-79	0.264	0.02	0.03774	0.0008	0.0119	0.00067	0.0494	0.0037	241	16	239.4	4.9	239	13	220	140	0.7	239.4	4.9
LYH196-6	0.29	0.13	0.0384	0.005	0.0178	0.0066	0.059	0.028	240	110	243	31	350	130	190	870	1.2	243	31
LYH196-2	0.274	0.01	0.03855	0.00053	0.01219	0.00034	0.0525	0.002	244.9	8	243.8	3.3	245.6	6.7	282	77	0.5	243.8	3.3
LYH196-32	0.272	0.024	0.0386	0.001	0.01197	0.00087	0.0522	0.005	242	19	243.9	6.4	240	17	230	180	0.8	243.9	6.4
LYH196-63	0.274	0.018	0.03874	0.00072	0.01252	0.00074	0.0516	0.0034	243	14	244.9	4.4	251	15	250	130	0.8	244.9	4.4
LYH196-22	0.274	0.014	0.03932	0.00064	0.0119	0.00083	0.0508	0.0027	246	12	248.5	4	243	16	230	100	1	248.5	4
LYH196-42	0.283	0.019	0.03951	0.00083	0.01253	0.00075	0.0499	0.0027	252	15	249.8	5.2	252	15	210	120	0.9	249.8	5.2
LYH196-86	0.299	0.029	0.0398	0.0012	0.01304	0.00077	0.0537	0.0053	253	21	250.1	6.7	262	15	220	170	1.2	250.1	6.7
LYH196-21	0.291	0.035	0.0397	0.0013	0.015	0.0015	0.0552	0.007	254	27	251.2	7.8	301	30	320	240	1.1	251.2	7.8
LYH196-68	0.273	0.024	0.03967	0.00085	0.01428	0.0008	0.053	0.0049	248	19	251.3	5.4	286	16	280	170	1.3	251.3	5.4
LYH196-111	0.286	0.012	0.0406	0.00055	0.01191	0.00071	0.0516	0.0021	254.3	9.6	256.5	3.4	239	14	243	78	0.9	256.5	3.4
LYH196-24	0.298	0.02	0.04062	0.00085	0.01188	0.00043	0.0531	0.0036	260	15	256.6	5.3	238.7	8.5	240	130	1.3	256.6	5.3
LYH196-109	0.297	0.039	0.0407	0.0013	0.01186	0.00078	0.0539	0.0076	255	30	257.3	7.9	238	16	220	250	0.9	257.3	7.9
LYH196-77	0.293	0.025	0.0409	0.0011	0.014	0.0011	0.0522	0.0047	257	20	258	7	280	21	280	170	0.4	258	7
LYH196-80	0.285	0.018	0.04097	0.00082	0.01343	0.00063	0.0506	0.0033	258	15	258.8	5.1	270	13	230	130	0.3	258.8	5.1
LYH196-57	0.293	0.008	0.04106	0.00039	0.01334	0.00042	0.0521	0.0013	260.1	6.3	259.4	2.4	267.9	8.3	270	54	0.3	259.4	2.4
LYH196-9	0.295	0.058	0.0417	0.0018	0.0132	0.0017	0.051	0.011	261	44	263	11	266	34	210	410	0.8	263	11
LYH196-10	0.302	0.037	0.0419	0.0025	0.0143	0.0017	0.0528	0.0062	264	29	264	16	286	35	250	220	0	264	16
LYH196-62	0.295	0.016	0.04212	0.00086	0.01444	0.00071	0.0514	0.003	262	13	266.4	5.3	291	14	220	110	1.7	266.4	5.3
LYH196-85	0.308	0.015	0.04269	0.00047	0.01363	0.00046	0.0529	0.0026	273	12	269.5	2.9	273.5	9.1	320	110	1.3	269.5	2.9
LYH196-5	0.287	0.087	0.0428	0.0035	0.013	0.0037	0.047	0.014	269	79	270	22	260	73	120	540	0.4	270	22
LYH196-65	0.304	0.013	0.04351	0.00063	0.01515	0.00051	0.0512	0.0023	271	10	274.5	3.9	305	10	234	85	1.3	274.5	3.9
LYH196-73	0.313	0.015	0.04405	0.00079	0.01461	0.0006	0.0522	0.0026	276	11	277.8	4.9	294	12	263	96	0.6	277.8	4.9
LYH196-69	0.367	0.021	0.05024	0.00084	0.01702	0.0009	0.0542	0.0033	312	15	315.9	5.1	341	18	300	110	1.2	315.9	5.1
LYH196-34	0.367	0.024	0.0502	0.0011	0.01603	0.00063	0.053	0.0035	314	18	316.1	6.6	321	13	270	120	0.7	316.1	6.6
LYH196-102	0.374	0.023	0.05072	0.00082	0.01419	0.00067	0.0524	0.0033	321	17	318.9	5	285	13	310	130	0.7	318.9	5
LYH196-56	0.41	0.19	0.0537	0.0053	0.0186	0.0059	0.053	0.021	340	140	337	32	370	120	240	770	0.9	337	32
LYH196-119	0.407	0.025	0.05429	0.00097	0.01786	0.00075	0.0541	0.0035	343	18	341.2	6	358	15	320	120	0.5	341.2	6
LYH196-81	0.43	0.034	0.0563	0.0018	0.018	0.0015	0.0547	0.0044	357	24	353	11	361	30	350	150	1.1	353	11
LYH196-3	0.517	0.039	0.0671	0.0017	0.0231	0.0024	0.0558	0.0045	417	26	418	10	461	47	440	160	0.2	418	10
LYH196-71	0.511	0.015	0.06743	0.00078	0.02207	0.00071	0.0552	0.0016	417	9.8	420.6	4.7	441	14	404	61	0.9	420.6	4.7
LYH196-18	0.526	0.021	0.0693	0.0014	0.0213	0.0014	0.056	0.0023	430	14	432	8.6	425	27	445	88	0.5	432	8.6
LYH196-23	0.553	0.024	0.0707	0.0011	0.02256	0.00084	0.0576	0.0024	443	16	441	6.4	451	17	476	86	0.5	441	6.4
LYH196-91	0.554	0.019	0.07111	0.00075	0.0218	0.00058	0.0563	0.002	446	13	442.8	4.5	436	12	458	76	0.7	442.8	4.5
LYH196-82	0.562	0.047	0.073	0.0025	0.0206	0.0015	0.0558	0.0049	451	31	454	15	411	30	470	210	0.7	454	15
LYH196-8	0.567	0.022	0.0741	0.001	0.02436	0.00074	0.0556	0.0022	458	14	460.9	6.3	486	15	452	87	0.6	460.9	6.3
LYH196-105	0.634	0.042	0.0798	0.0013	0.0229	0.0014	0.0587	0.0039	493	25	494.6	7.7	458	27	460	120	0.3	494.6	7.7
LYH196-106	1.283	0.046	0.139	0.0018	0.0403	0.0016	0.0676	0.0023	839	20	839	10	797	31	857	78	0	839	10
LYH196-16	2.022	0.061	0.1893	0.0028	0.0586	0.0015	0.0774	0.0021	1119	21	1117	15	1150	29	1124	54	0.2	1117	15
LYH196-47	2.88	0.13	0.2358	0.0035	0.0714	0.003	0.0875	0.0036	1367	33	1364	18	1392	57	1351	78	0.2	1364	18
LYH196-46	4.21	0.55	0.296	0.021	0.101	0.021	0.102	0.011	1660	110	1670	100	1940	380	1710	150	0.6	1670	100
LYH196-55	4.29	0.29	0.2998	0.0079	0.0946	0.007	0.1049	0.0068	1691	55	1688	39	1820	130	1700	120	0.2	1688	39
LYH196-20	4.33	0.24	0.3016	0.0076	0.0856	0.0048	0.1037	0.0059	1694	49	1698	38	1657	90	1650	110	0.2	1698	38
LYH196-89	4.47	0.39	0.303	0.011	0.0886	0.0058	0.1014	0.0075	1705	73	1703	55	1710	110	1670	140	0.1	1703	55
LYH196-83	4.5	0.14	0.3057	0.0036	0.09	0.0022	0.1071	0.0031	1723	25	1719	18	1739	42	1749	53	0.2	1719	18
LYH196-48	4.49	0.2	0.3062	0.0052	0.102	0.0049	0.1068	0.0048	1719	38	1720	26	1955	90	1735	84	0.1	1720	26
LYH196-121	4.49	0.25	0.307	0.015	0.094	0.015	0.1049	0.009	1728	47	1726	74	1820	270	1700	160	0.1	1726	74
LYH196-107	4.56	0.45	0.309	0.014	0.0815	0.0044	0.109	0.011	1739	82	1736	68	1583	81	1770	180	0.2	1736	68
LYH196-14	4.46	0.22	0.3101	0.006	0.1006	0.0051	0.1053	0.0053	1740	41	1739	30	1939	95	1736	92	0.1	1739	30
LYH196-108	4.56	0.42	0.31	0.017	0.0755	0.0035	0.1076	0.0092	1736	77	1739	83	1470	66	1740	160	0.2	1739	83
LYH196-4	4.8	0.54	0.314	0.016	0.104	0.011	0.107	0.011	1755	96	1756	77	2030	190	1730	210	0.1	1756	77
LYH196-59	4.8	0.24	0.3206	0.009	0.0974	0.0043	0.1074	0.005	1785	44	1791	44	1878	79	1754	89	0.3	1791	44
LYH196-60	4.92	0.56	0.3223	0.0083	0.1	0.016	0.114	0.011	1797	93	1801	40	1910	290	1840	180	0.2	1801	40
LYH196-53	5.17	0.45	0.332	0.013	0.095	0.011	0.115	0.01	1847	78	1844	62	1810	190	1940	160	0.2	1844	62
LYH196-75	5.19	0.1	0.3317	0.0048	0.1015	0.0041	0.1136	0.0023	1849	17	1846	23	1952	75	1852	36	0.2	1846	23
LYH196-41	5.29	0.1	0.3358	0.0058	0.0991	0.0033	0.1129	0.0021	1865	16	1865	28	1909	61	1841	33	0	1865	28
LYH196-93	5.349	0.088	0.3375	0.0029	0.0869	0.0031	0.1151	0.0017	1876	14	1874	14	1682	57	1875	26	0.1	1874	14
LYH196-104	5.315	0.084	0.3375	0.0033	0.0907	0.0029	0.1143	0.0015	1871	14	1874	16	1752	53	1866	24	0.2	1874	16
LYH196-50	5.37	0.12	0.3377	0.0033	0.1039	0.0033	0.116	0.0026	1876	19	1875	16	1995	60	1889	40	0.1	1875	16
LYH196-87	5.33	0.13	0.3378	0.0037	0.0935	0.0029	0.1151	0.0026	1872	21	1875	18	1813	53	1875	41	0.2	1875	18
LYH196-94	5.35	0.26	0.3391	0.0065	0.0888	0.005	0.1163	0.0045	1883	40	1882	31	1718	93	1893	73	0.1	1882	31
LYH196-97	5.41	0.16	0.3408	0.0059	0.0865	0.0037	0.116	0.0024	1888	24	1890	29	1675	69	1892	37	0.1	1890	29
LYH196-43	5.49	0.21	0.3427	0.0079	0.0701	0.004	0.1152	0.0041	1900	34	1898	38	1368	75	1880	67	0.1	1898	38
LYH196-51	5.54	0.25	0.343	0.013	0.1079	0.0073	0.1176	0.005	1900	39	1899	60	2070	130	1916	79	0.1	1899	60
LYH196-115	5.47	0.26	0.3432	0.0052	0.0896	0.0049	0.1131	0.0049	1901	43	1902	25	1734	90	1877	80	0.1	1902	25
LYH196-118	5.562	0.099	0.3437	0.0026	0.0961	0.0014	0.1154	0.0019	1907	15	1904	13	1856	26	1882	29	0.2	1904	13
LYH196-15	5.56	0.27	0.3462	0.0091	0.1064	0.0062	0.1169	0.0042	1915	40	1915	43	2040	110	1895	65	0	1915	43
LYH196-17	5.59	0.23	0.3445	0.0062	0.0984	0.0042	0.1196	0.0053	1915	36	1917	32	1896	76	1949	80	0.1	1917	32
LYH196-29	5.73	0.24	0.3484	0.0093	0.1014	0.0071	0.1202	0.0049	1927	37	1925	45	1970	140	1960	70	0.1	1925	45
LYH196-36	5.84	0.18	0.3536	0.005	0.109	0.0036	0.1218	0.0036	1953	28	1951	24	2089	66	1971	54	0.1	1951	24
LYH196-7	6.81	0.33	0.381	0.011	0.1206	0.0068	0.131	0.0062	2077	43	2079	51	2300	120	2120	81	0.1	2079	51
LYH196-61	7.51	0.41	0.3986	0.0096	0.1143	0.0089	0.1377	0.0072	2166	49	2161	44	2180	160	2178	91	0.2	2161	44
LYH196-67	7.69	0.18	0.4045	0.0036	0.1215	0.0039	0.1387	0.0027	2187	21	2189	17	2320	69	2213	34	0.1	2189	17
LYH196-27	8.12	0.15	0.4099	0.004	0.1207	0.0032	0.1428	0.0026	2242	17	2213	18	2299	58	2257	32	1.3	2213	18
LYH196-37	7.92	0.36	0.412	0.0054	0.1184	0.0052	0.1394	0.006	2227	42	2223	25	2258	93	2235	75	0.2	2223	25
LYH196-112	8.02	0.32	0.415	0.024	0.121	0.013	0.1409	0.0098	2232	37	2240	110	2310	230	2230	120	0.4	2240	110
LYH196-12	9.66	0.5	0.446	0.01	0.1222	0.0078	0.1562	0.008	2373	49	2373	45	2370	140	2382	86	0	2373	45
LYH196-25	9.98	0.18	0.4478	0.0051	0.1312	0.0029	0.1589	0.0023	2434	17	2384	23	2488	52	2445	24	2.1	2384	23
LYH196-45	9.99	0.72	0.457	0.023	0.138	0.018	0.16	0.013	2429	63	2426	99	2610	310	2490	150	0.1	2426	99
LYH196-110	10.04	0.22	0.4608	0.0045	0.1146	0.0022	0.1586	0.0026	2438	20	2442	20	2190	41	2442	28	0.2	2442	20
LYH196-52	10.13	0.39	0.461	0.014	0.1336	0.0077	0.1586	0.0066	2445	35	2444	60	2530	140	2470	71	0	2444	60
LYH196-19	10.12	0.36	0.461	0.012	0.126	0.012	0.1659	0.0084	2444	33	2445	54	2390	210	2511	86	0	2445	54
LYH196-38	10.38	0.58	0.4649	0.0088	0.1425	0.0068	0.1647	0.0087	2459	53	2460	39	2710	110	2482	86	0	2460	39
LYH196-116	10.28	0.67	0.465	0.025	0.126	0.019	0.1568	0.0067	2458	61	2460	110	2400	340	2419	74	0.1	2460	110
LYH196-40	10.48	0.32	0.464	0.012	0.163	0.011	0.164	0.0045	2471	28	2469	55	3040	190	2491	45	0.1	2469	55
LYH196-13	10.57	0.18	0.4703	0.0058	0.1441	0.0041	0.1634	0.0025	2484	16	2485	26	2723	73	2491	27	0	2485	26
LYH196-114	10.67	0.31	0.4714	0.0086	0.1238	0.004	0.1623	0.0047	2487	28	2487	38	2355	73	2479	50	0	2487	38
LYH196-70	10.7	0.18	0.4734	0.0049	0.1257	0.0058	0.1649	0.0027	2497	15	2499	21	2400	100	2507	28	0.1	2499	21
LYH196-58	10.83	0.49	0.476	0.01	0.1434	0.0061	0.1634	0.007	2503	43	2506	44	2700	110	2478	75	0.1	2506	44
LYH196-88	10.91	0.31	0.4756	0.0089	0.1373	0.0049	0.1667	0.0039	2510	27	2506	39	2597	88	2526	39	0.2	2506	39
LYH196-64	11.05	0.8	0.479	0.013	0.135	0.011	0.17	0.012	2518	71	2517	58	2550	200	2520	110	0	2517	58
LYH196-11	11.4	1.1	0.484	0.031	0.165	0.016	0.17	0.017	2538	96	2540	130	3080	270	2530	160	0.1	2540	130
LYH196-90	11.27	0.71	0.484	0.015	0.1222	0.0039	0.1695	0.0082	2543	59	2545	66	2330	71	2549	81	0.1	2545	66
LYH196-76	11.32	0.49	0.486	0.012	0.1393	0.0071	0.1647	0.0061	2550	41	2548	50	2630	130	2504	64	0.1	2548	50
LYH196-39	11.44	0.46	0.488	0.011	0.162	0.011	0.173	0.0064	2570	38	2567	47	3030	200	2584	59	0.1	2567	47
LYH196-103	11.58	0.16	0.4895	0.004	0.1276	0.0022	0.1726	0.0022	2570	13	2568	17	2426	39	2585	22	0.1	2568	17
LYH196-35	11.72	0.24	0.4915	0.0073	0.1423	0.0038	0.1741	0.0039	2579	19	2579	31	2687	67	2596	38	0	2579	31
LYH196-31	12.26	0.19	0.5018	0.0062	0.1368	0.0045	0.1787	0.0024	2624	15	2624	27	2585	80	2642	22	0	2624	27
LYH196-113	0.1523	0.0053	0.02193	0.00021	0.00652	0.00019	0.0503	0.0018	143.6	4.6	139.8	1.3	131.3	3.8	194	71	2.7	139.8	1.3
LYH196-30	0.26	0.028	0.0369	0.0011	0.0135	0.0016	0.0502	0.0059	233	23	233.5	6.6	272	32	220	240	0.2	233.5	6.6
LYH196-79	0.264	0.02	0.03774	0.0008	0.0119	0.00067	0.0494	0.0037	241	16	239.4	4.9	239	13	220	140	0.7	239.4	4.9
LYH196-6	0.29	0.13	0.0384	0.005	0.0178	0.0066	0.059	0.028	240	110	243	31	350	130	190	870	1.2	243	31
LYH196-2	0.274	0.01	0.03855	0.00053	0.01219	0.00034	0.0525	0.002	244.9	8	243.8	3.3	245.6	6.7	282	77	0.5	243.8	3.3
LYH196-32	0.272	0.024	0.0386	0.001	0.01197	0.00087	0.0522	0.005	242	19	243.9	6.4	240	17	230	180	0.8	243.9	6.4
LYH196-63	0.274	0.018	0.03874	0.00072	0.01252	0.00074	0.0516	0.0034	243	14	244.9	4.4	251	15	250	130	0.8	244.9	4.4
LYH196-22	0.274	0.014	0.03932	0.00064	0.0119	0.00083	0.0508	0.0027	246	12	248.5	4	243	16	230	100	1	248.5	4
LYH196-42	0.283	0.019	0.03951	0.00083	0.01253	0.00075	0.0499	0.0027	252	15	249.8	5.2	252	15	210	120	0.9	249.8	5.2
LYH196-86	0.299	0.029	0.0398	0.0012	0.01304	0.00077	0.0537	0.0053	253	21	250.1	6.7	262	15	220	170	1.2	250.1	6.7
LYH196-21	0.291	0.035	0.0397	0.0013	0.015	0.0015	0.0552	0.007	254	27	251.2	7.8	301	30	320	240	1.1	251.2	7.8
LYH196-68	0.273	0.024	0.03967	0.00085	0.01428	0.0008	0.053	0.0049	248	19	251.3	5.4	286	16	280	170	1.3	251.3	5.4
LYH196-111	0.286	0.012	0.0406	0.00055	0.01191	0.00071	0.0516	0.0021	254.3	9.6	256.5	3.4	239	14	243	78	0.9	256.5	3.4
LYH196-24	0.298	0.02	0.04062	0.00085	0.01188	0.00043	0.0531	0.0036	260	15	256.6	5.3	238.7	8.5	240	130	1.3	256.6	5.3
LYH196-109	0.297	0.039	0.0407	0.0013	0.01186	0.00078	0.0539	0.0076	255	30	257.3	7.9	238	16	220	250	0.9	257.3	7.9
LYH196-77	0.293	0.025	0.0409	0.0011	0.014	0.0011	0.0522	0.0047	257	20	258	7	280	21	280	170	0.4	258	7
LYH196-80	0.285	0.018	0.04097	0.00082	0.01343	0.00063	0.0506	0.0033	258	15	258.8	5.1	270	13	230	130	0.3	258.8	5.1
LYH196-57	0.293	0.008	0.04106	0.00039	0.01334	0.00042	0.0521	0.0013	260.1	6.3	259.4	2.4	267.9	8.3	270	54	0.3	259.4	2.4
LYH196-9	0.295	0.058	0.0417	0.0018	0.0132	0.0017	0.051	0.011	261	44	263	11	266	34	210	410	0.8	263	11
LYH196-10	0.302	0.037	0.0419	0.0025	0.0143	0.0017	0.0528	0.0062	264	29	264	16	286	35	250	220	0	264	16
LYH196-62	0.295	0.016	0.04212	0.00086	0.01444	0.00071	0.0514	0.003	262	13	266.4	5.3	291	14	220	110	1.7	266.4	5.3
LYH196-85	0.308	0.015	0.04269	0.00047	0.01363	0.00046	0.0529	0.0026	273	12	269.5	2.9	273.5	9.1	320	110	1.3	269.5	2.9
LYH196-5	0.287	0.087	0.0428	0.0035	0.013	0.0037	0.047	0.014	269	79	270	22	260	73	120	540	0.4	270	22
LYH196-65	0.304	0.013	0.04351	0.00063	0.01515	0.00051	0.0512	0.0023	271	10	274.5	3.9	305	10	234	85	1.3	274.5	3.9
LYH196-73	0.313	0.015	0.04405	0.00079	0.01461	0.0006	0.0522	0.0026	276	11	277.8	4.9	294	12	263	96	0.6	277.8	4.9
LYH196-69	0.367	0.021	0.05024	0.00084	0.01702	0.0009	0.0542	0.0033	312	15	315.9	5.1	341	18	300	110	1.2	315.9	5.1
LYH196-34	0.367	0.024	0.0502	0.0011	0.01603	0.00063	0.053	0.0035	314	18	316.1	6.6	321	13	270	120	0.7	316.1	6.6
LYH196-102	0.374	0.023	0.05072	0.00082	0.01419	0.00067	0.0524	0.0033	321	17	318.9	5	285	13	310	130	0.7	318.9	5
LYH196-56	0.41	0.19	0.0537	0.0053	0.0186	0.0059	0.053	0.021	340	140	337	32	370	120	240	770	0.9	337	32
LYH196-119	0.407	0.025	0.05429	0.00097	0.01786	0.00075	0.0541	0.0035	343	18	341.2	6	358	15	320	120	0.5	341.2	6
LYH196-81	0.43	0.034	0.0563	0.0018	0.018	0.0015	0.0547	0.0044	357	24	353	11	361	30	350	150	1.1	353	11
LYH196-3	0.517	0.039	0.0671	0.0017	0.0231	0.0024	0.0558	0.0045	417	26	418	10	461	47	440	160	0.2	418	10
LYH196-71	0.511	0.015	0.06743	0.00078	0.02207	0.00071	0.0552	0.0016	417	9.8	420.6	4.7	441	14	404	61	0.9	420.6	4.7
LYH196-18	0.526	0.021	0.0693	0.0014	0.0213	0.0014	0.056	0.0023	430	14	432	8.6	425	27	445	88	0.5	432	8.6
LYH196-23	0.553	0.024	0.0707	0.0011	0.02256	0.00084	0.0576	0.0024	443	16	441	6.4	451	17	476	86	0.5	441	6.4
LYH196-91	0.554	0.019	0.07111	0.00075	0.0218	0.00058	0.0563	0.002	446	13	442.8	4.5	436	12	458	76	0.7	442.8	4.5
LYH196-82	0.562	0.047	0.073	0.0025	0.0206	0.0015	0.0558	0.0049	451	31	454	15	411	30	470	210	0.7	454	15
LYH196-8	0.567	0.022	0.0741	0.001	0.02436	0.00074	0.0556	0.0022	458	14	460.9	6.3	486	15	452	87	0.6	460.9	6.3
LYH196-105	0.634	0.042	0.0798	0.0013	0.0229	0.0014	0.0587	0.0039	493	25	494.6	7.7	458	27	460	120	0.3	494.6	7.7
LYH196-106	1.283	0.046	0.139	0.0018	0.0403	0.0016	0.0676	0.0023	839	20	839	10	797	31	857	78	0	839	10
LYH196-16	2.022	0.061	0.1893	0.0028	0.0586	0.0015	0.0774	0.0021	1119	21	1117	15	1150	29	1124	54	0.2	1117	15
LYH196-47	2.88	0.13	0.2358	0.0035	0.0714	0.003	0.0875	0.0036	1367	33	1364	18	1392	57	1351	78	0.2	1364	18
LYH196-46	4.21	0.55	0.296	0.021	0.101	0.021	0.102	0.011	1660	110	1670	100	1940	380	1710	150	0.6	1670	100
LYH196-55	4.29	0.29	0.2998	0.0079	0.0946	0.007	0.1049	0.0068	1691	55	1688	39	1820	130	1700	120	0.2	1688	39
LYH196-20	4.33	0.24	0.3016	0.0076	0.0856	0.0048	0.1037	0.0059	1694	49	1698	38	1657	90	1650	110	0.2	1698	38
LYH196-89	4.47	0.39	0.303	0.011	0.0886	0.0058	0.1014	0.0075	1705	73	1703	55	1710	110	1670	140	0.1	1703	55
LYH196-83	4.5	0.14	0.3057	0.0036	0.09	0.0022	0.1071	0.0031	1723	25	1719	18	1739	42	1749	53	0.2	1719	18
LYH196-48	4.49	0.2	0.3062	0.0052	0.102	0.0049	0.1068	0.0048	1719	38	1720	26	1955	90	1735	84	0.1	1720	26
LYH196-121	4.49	0.25	0.307	0.015	0.094	0.015	0.1049	0.009	1728	47	1726	74	1820	270	1700	160	0.1	1726	74
LYH196-107	4.56	0.45	0.309	0.014	0.0815	0.0044	0.109	0.011	1739	82	1736	68	1583	81	1770	180	0.2	1736	68
LYH196-14	4.46	0.22	0.3101	0.006	0.1006	0.0051	0.1053	0.0053	1740	41	1739	30	1939	95	1736	92	0.1	1739	30
LYH196-108	4.56	0.42	0.31	0.017	0.0755	0.0035	0.1076	0.0092	1736	77	1739	83	1470	66	1740	160	0.2	1739	83
LYH196-4	4.8	0.54	0.314	0.016	0.104	0.011	0.107	0.011	1755	96	1756	77	2030	190	1730	210	0.1	1756	77
LYH196-59	4.8	0.24	0.3206	0.009	0.0974	0.0043	0.1074	0.005	1785	44	1791	44	1878	79	1754	89	0.3	1791	44
LYH196-60	4.92	0.56	0.3223	0.0083	0.1	0.016	0.114	0.011	1797	93	1801	40	1910	290	1840	180	0.2	1801	40
LYH196-53	5.17	0.45	0.332	0.013	0.095	0.011	0.115	0.01	1847	78	1844	62	1810	190	1940	160	0.2	1844	62
LYH196-75	5.19	0.1	0.3317	0.0048	0.1015	0.0041	0.1136	0.0023	1849	17	1846	23	1952	75	1852	36	0.2	1846	23
LYH196-41	5.29	0.1	0.3358	0.0058	0.0991	0.0033	0.1129	0.0021	1865	16	1865	28	1909	61	1841	33	0	1865	28
LYH196-93	5.349	0.088	0.3375	0.0029	0.0869	0.0031	0.1151	0.0017	1876	14	1874	14	1682	57	1875	26	0.1	1874	14
LYH196-104	5.315	0.084	0.3375	0.0033	0.0907	0.0029	0.1143	0.0015	1871	14	1874	16	1752	53	1866	24	0.2	1874	16
LYH196-50	5.37	0.12	0.3377	0.0033	0.1039	0.0033	0.116	0.0026	1876	19	1875	16	1995	60	1889	40	0.1	1875	16
LYH196-87	5.33	0.13	0.3378	0.0037	0.0935	0.0029	0.1151	0.0026	1872	21	1875	18	1813	53	1875	41	0.2	1875	18
LYH196-94	5.35	0.26	0.3391	0.0065	0.0888	0.005	0.1163	0.0045	1883	40	1882	31	1718	93	1893	73	0.1	1882	31
LYH196-97	5.41	0.16	0.3408	0.0059	0.0865	0.0037	0.116	0.0024	1888	24	1890	29	1675	69	1892	37	0.1	1890	29
LYH196-43	5.49	0.21	0.3427	0.0079	0.0701	0.004	0.1152	0.0041	1900	34	1898	38	1368	75	1880	67	0.1	1898	38
LYH196-51	5.54	0.25	0.343	0.013	0.1079	0.0073	0.1176	0.005	1900	39	1899	60	2070	130	1916	79	0.1	1899	60
LYH196-115	5.47	0.26	0.3432	0.0052	0.0896	0.0049	0.1131	0.0049	1901	43	1902	25	1734	90	1877	80	0.1	1902	25
LYH196-118	5.562	0.099	0.3437	0.0026	0.0961	0.0014	0.1154	0.0019	1907	15	1904	13	1856	26	1882	29	0.2	1904	13
LYH196-15	5.56	0.27	0.3462	0.0091	0.1064	0.0062	0.1169	0.0042	1915	40	1915	43	2040	110	1895	65	0	1915	43
LYH196-17	5.59	0.23	0.3445	0.0062	0.0984	0.0042	0.1196	0.0053	1915	36	1917	32	1896	76	1949	80	0.1	1917	32
LYH196-29	5.73	0.24	0.3484	0.0093	0.1014	0.0071	0.1202	0.0049	1927	37	1925	45	1970	140	1960	70	0.1	1925	45
LYH196-36	5.84	0.18	0.3536	0.005	0.109	0.0036	0.1218	0.0036	1953	28	1951	24	2089	66	1971	54	0.1	1951	24
LYH196-7	6.81	0.33	0.381	0.011	0.1206	0.0068	0.131	0.0062	2077	43	2079	51	2300	120	2120	81	0.1	2079	51
LYH196-61	7.51	0.41	0.3986	0.0096	0.1143	0.0089	0.1377	0.0072	2166	49	2161	44	2180	160	2178	91	0.2	2161	44
LYH196-67	7.69	0.18	0.4045	0.0036	0.1215	0.0039	0.1387	0.0027	2187	21	2189	17	2320	69	2213	34	0.1	2189	17
LYH196-27	8.12	0.15	0.4099	0.004	0.1207	0.0032	0.1428	0.0026	2242	17	2213	18	2299	58	2257	32	1.3	2213	18
LYH196-37	7.92	0.36	0.412	0.0054	0.1184	0.0052	0.1394	0.006	2227	42	2223	25	2258	93	2235	75	0.2	2223	25
LYH196-112	8.02	0.32	0.415	0.024	0.121	0.013	0.1409	0.0098	2232	37	2240	110	2310	230	2230	120	0.4	2240	110
LYH196-12	9.66	0.5	0.446	0.01	0.1222	0.0078	0.1562	0.008	2373	49	2373	45	2370	140	2382	86	0	2373	45
LYH196-25	9.98	0.18	0.4478	0.0051	0.1312	0.0029	0.1589	0.0023	2434	17	2384	23	2488	52	2445	24	2.1	2384	23
LYH196-45	9.99	0.72	0.457	0.023	0.138	0.018	0.16	0.013	2429	63	2426	99	2610	310	2490	150	0.1	2426	99
LYH196-110	10.04	0.22	0.4608	0.0045	0.1146	0.0022	0.1586	0.0026	2438	20	2442	20	2190	41	2442	28	0.2	2442	20
LYH196-52	10.13	0.39	0.461	0.014	0.1336	0.0077	0.1586	0.0066	2445	35	2444	60	2530	140	2470	71	0	2444	60
LYH196-19	10.12	0.36	0.461	0.012	0.126	0.012	0.1659	0.0084	2444	33	2445	54	2390	210	2511	86	0	2445	54
LYH196-38	10.38	0.58	0.4649	0.0088	0.1425	0.0068	0.1647	0.0087	2459	53	2460	39	2710	110	2482	86	0	2460	39
LYH196-116	10.28	0.67	0.465	0.025	0.126	0.019	0.1568	0.0067	2458	61	2460	110	2400	340	2419	74	0.1	2460	110
LYH196-40	10.48	0.32	0.464	0.012	0.163	0.011	0.164	0.0045	2471	28	2469	55	3040	190	2491	45	0.1	2469	55
LYH196-13	10.57	0.18	0.4703	0.0058	0.1441	0.0041	0.1634	0.0025	2484	16	2485	26	2723	73	2491	27	0	2485	26
LYH196-114	10.67	0.31	0.4714	0.0086	0.1238	0.004	0.1623	0.0047	2487	28	2487	38	2355	73	2479	50	0	2487	38
LYH196-70	10.7	0.18	0.4734	0.0049	0.1257	0.0058	0.1649	0.0027	2497	15	2499	21	2400	100	2507	28	0.1	2499	21
LYH196-58	10.83	0.49	0.476	0.01	0.1434	0.0061	0.1634	0.007	2503	43	2506	44	2700	110	2478	75	0.1	2506	44
LYH196-88	10.91	0.31	0.4756	0.0089	0.1373	0.0049	0.1667	0.0039	2510	27	2506	39	2597	88	2526	39	0.2	2506	39
LYH196-64	11.05	0.8	0.479	0.013	0.135	0.011	0.17	0.012	2518	71	2517	58	2550	200	2520	110	0	2517	58
LYH196-11	11.4	1.1	0.484	0.031	0.165	0.016	0.17	0.017	2538	96	2540	130	3080	270	2530	160	0.1	2540	130
LYH196-90	11.27	0.71	0.484	0.015	0.1222	0.0039	0.1695	0.0082	2543	59	2545	66	2330	71	2549	81	0.1	2545	66
LYH196-76	11.32	0.49	0.486	0.012	0.1393	0.0071	0.1647	0.0061	2550	41	2548	50	2630	130	2504	64	0.1	2548	50
LYH196-39	11.44	0.46	0.488	0.011	0.162	0.011	0.173	0.0064	2570	38	2567	47	3030	200	2584	59	0.1	2567	47
LYH196-103	11.58	0.16	0.4895	0.004	0.1276	0.0022	0.1726	0.0022	2570	13	2568	17	2426	39	2585	22	0.1	2568	17
LYH196-35	11.72	0.24	0.4915	0.0073	0.1423	0.0038	0.1741	0.0039	2579	19	2579	31	2687	67	2596	38	0	2579	31
LYH196-31	12.26	0.19	0.5018	0.0062	0.1368	0.0045	0.1787	0.0024	2624	15	2624	27	2585	80	2642	22	0	2624	27

## Sheet: Sample6
Analysis	Ratios								Ages								Discordance (%)	Best Age (Ma)
	207Pb/235U		206Pb/238U		208Pb/232Th		207Pb/206Pb		207Pb/235U		206Pb/238U		208Pb/232Th		207Pb/206Pb
		2 s.e.		2 s.e.		2 s.e.		2 s.e.		2 s.e.		2 s.e.		2 s.e.		2 s.e.			2 s.e.
LYH210-15	0.18	0.018	0.02632	0.0009	-0.00392	0.00032	0.0471	0.0045	167	15	167.4	5.6	-79.4	6.5	90	180	0.2	167.4	5.6
LYH210-87	0.219	0.02	0.0308	0.00074	0.017	0.017	0.0497	0.0045	195	17	195.5	4.6	470	190	130	160	0.3	195.5	4.6
LYH210-117	0.226	0.011	0.03168	0.00049	0.0181	0.0026	0.0509	0.0025	204.9	9.3	201	3.1	360	51	220	96	1.9	201	3.1
LYH210-102	0.227	0.025	0.03178	0.00092	0.0162	0.0024	0.0533	0.0059	203	21	201.6	5.8	323	47	170	190	0.7	201.6	5.8
LYH210-83	0.221	0.015	0.03178	0.00062	0.0123	0.0013	0.0497	0.0034	202	12	202	3.8	246	26	190	130	0	202	3.8
LYH210-41	0.2198	0.0094	0.03196	0.0005	0.0119	0.0011	0.0502	0.0022	202.5	7.6	202.8	3.1	236	22	189	86	0.1	202.8	3.1
LYH210-77	0.228	0.015	0.03206	0.00065	0.027	0.012	0.0512	0.0032	206	12	203.4	4.1	390	180	270	120	1.3	203.4	4.1
LYH210-108	0.225	0.013	0.03232	0.0005	0.0319	0.007	0.049	0.0028	207	11	205	3.1	620	130	170	110	1	205	3.1
LYH210-97	0.23	0.012	0.03245	0.00058	0.0139	0.0016	0.0517	0.0028	208	10	205.8	3.6	279	31	260	100	1.1	205.8	3.6
LYH210-43	0.224	0.013	0.0326	0.00076	0.00587	0.00041	0.051	0.0029	206	11	206.8	4.8	118.3	8.2	240	120	0.4	206.8	4.8
LYH210-95	0.2277	0.0085	0.0327	0.00041	0.019	0.011	0.05	0.0017	207.1	7	207.4	2.6	410	120	199	67	0.1	207.4	2.6
LYH210-54	0.228	0.02	0.03297	0.00094	0.00737	0.00051	0.0507	0.0044	210	16	209.6	5.9	148	10	180	160	0.2	209.6	5.9
LYH210-49	0.2338	0.0071	0.03372	0.00035	0.024	0.016	0.0502	0.0016	213.2	5.8	213.8	2.2	490	110	193	65	0.3	213.8	2.2
LYH210-91	0.238	0.015	0.03385	0.00082	0.00868	0.0006	0.0504	0.0032	217	12	214.6	5.1	175	12	200	120	1.1	214.6	5.1
LYH210-86	0.238	0.012	0.03432	0.00052	0.0175	0.0024	0.0491	0.0025	216	9.3	217.5	3.2	349	47	163	97	0.7	217.5	3.2
LYH210-103	0.239	0.01	0.03432	0.00047	0.0174	0.0023	0.0509	0.0021	217.1	8.3	217.5	2.9	341	43	215	82	0.2	217.5	2.9
LYH210-52	0.2444	0.0082	0.03458	0.00049	0.01104	0.00091	0.0511	0.0018	221.8	6.6	219.1	3	222	18	235	72	1.2	219.1	3
LYH210-27	0.243	0.017	0.0349	0.001	0.0068	0.00051	0.0527	0.0038	220	13	221.2	6.3	137	10	270	140	0.5	221.2	6.3
LYH210-115	0.2429	0.0096	0.03503	0.00048	0.018	0.018	0.0503	0.002	220.1	7.7	221.9	3	370	190	204	76	0.8	221.9	3
LYH210-38	0.245	0.012	0.0352	0.00052	0.014	0.012	0.0501	0.0023	222.1	9.5	222.9	3.2	370	120	177	90	0.4	222.9	3.2
LYH210-89	0.2473	0.0092	0.03525	0.00055	0.019	0.012	0.0498	0.0019	223.7	7.6	223.2	3.4	430	170	202	74	0.2	223.2	3.4
LYH210-78	0.2519	0.0077	0.03541	0.00049	0.01112	0.00076	0.0505	0.0015	227.5	6.3	224.3	3.1	223	15	225	63	1.4	224.3	3.1
LYH210-5	0.251	0.018	0.03547	0.00077	0.00813	0.0005	0.0517	0.0038	224	15	224.6	4.8	164	10	230	140	0.3	224.6	4.8
LYH210-84	0.2541	0.0096	0.03564	0.00049	0.00961	0.00068	0.0528	0.002	229.8	7.6	225.7	3	193	14	298	78	1.8	225.7	3
LYH210-64	0.249	0.012	0.03568	0.00053	0.021	0.0094	0.0511	0.0025	225.4	9.7	226	3.3	400	140	231	91	0.3	226	3.3
LYH210-51	0.2589	0.0094	0.03685	0.00047	0.018	0.012	0.0509	0.0018	232.5	7.6	233.2	2.9	470	130	216	70	0.3	233.2	2.9
LYH210-53	0.2655	0.0075	0.03786	0.00038	0.0251	0.0075	0.0506	0.0014	239.8	6	239.7	2.4	520	120	209	58	0	239.7	2.4
LYH210-98	0.268	0.012	0.03802	0.00058	0.015	0.016	0.0528	0.0023	239.6	9.6	240.5	3.6	460	150	272	86	0.4	240.5	3.6
LYH210-26	0.285	0.011	0.03976	0.0006	0.01157	0.00096	0.0525	0.0021	255.6	8.9	251.3	3.7	232	19	284	81	1.7	251.3	3.7
LYH210-23	0.314	0.021	0.04297	0.00071	0.0193	0.0023	0.052	0.0035	272	16	271.1	4.4	383	45	260	130	0.3	271.1	4.4
LYH210-73	0.327	0.022	0.04572	0.00097	0.01145	0.0009	0.0516	0.0035	286	16	288.1	6	230	18	280	130	0.7	288.1	6
LYH210-82	0.337	0.025	0.0465	0.001	0.0185	0.002	0.0522	0.0039	291	19	292.7	6.4	369	39	240	140	0.6	292.7	6.4
LYH210-40	0.426	0.057	0.0576	0.0014	0.13	0.16	0.0547	0.0074	362	43	361.1	8.4	3300	1900	320	270	0.2	361.1	8.4
LYH210-76	0.501	0.025	0.0655	0.0011	0.0359	0.0053	0.0566	0.003	411	18	408.7	6.6	683	93	390	110	0.6	408.7	6.6
LYH210-63	0.494	0.028	0.0655	0.0012	0.039	0.042	0.0558	0.0033	408	19	408.8	7.1	910	310	400	110	0.2	408.8	7.1
LYH210-56	0.5	0.036	0.0662	0.0017	0.09	0.053	0.0543	0.004	413	23	413	10	1500	520	360	140	0	413	10
LYH210-101	0.491	0.024	0.0664	0.0012	0.0243	0.002	0.055	0.0026	407	16	414.3	7.2	485	39	397	98	1.8	414.3	7.2
LYH210-9	0.5	0.015	0.06635	0.00075	0.0243	0.0025	0.0554	0.0016	413	10	414.5	4.5	476	47	407	62	0.4	414.5	4.5
LYH210-81	0.511	0.027	0.0678	0.0012	0.074	0.04	0.0542	0.0028	419	18	422.8	7.1	1300	390	350	100	0.9	422.8	7.1
LYH210-112	0.517	0.026	0.0684	0.0011	0.069	0.02	0.0539	0.0027	425	17	426.5	6.5	1090	230	329	99	0.4	426.5	6.5
LYH210-93	0.554	0.033	0.0699	0.0014	0.021	0.0017	0.0566	0.0035	440	22	435.1	8.4	418	34	450	120	1.1	435.1	8.4
LYH210-90	0.546	0.031	0.07	0.0011	0.0396	0.0058	0.0555	0.003	436	20	436.1	6.6	750	100	410	110	0	436.1	6.6
LYH210-1	0.539	0.021	0.0704	0.00069	0.0317	0.0045	0.0551	0.0021	435	14	438.5	4.1	622	85	389	79	0.8	438.5	4.1
LYH210-96	0.547	0.03	0.0705	0.0013	0.0367	0.0047	0.0562	0.003	438	20	438.8	7.6	706	85	400	110	0.2	438.8	7.6
LYH210-111	0.544	0.013	0.07049	0.00079	0.035	0.023	0.0556	0.0013	439.6	8.6	439	4.7	820	330	417	50	0.1	439	4.7
LYH210-33	0.545	0.019	0.07061	0.00091	0.063	0.022	0.0564	0.002	439	13	439.7	5.5	830	150	424	74	0.2	439.7	5.5
LYH210-67	0.547	0.023	0.0707	0.0016	0.019	0.0011	0.0568	0.0025	441	15	440.3	9.6	381	22	469	96	0.2	440.3	9.6
LYH210-8	0.549	0.022	0.0709	0.001	0.0328	0.0047	0.0553	0.0022	442	14	441.6	6.1	630	84	415	80	0.1	441.6	6.1
LYH210-60	0.547	0.035	0.0712	0.0012	0.0318	0.0038	0.0555	0.0036	445	23	443.3	7.4	607	69	430	130	0.4	443.3	7.4
LYH210-104	0.552	0.024	0.0713	0.0011	0.061	0.031	0.0566	0.0024	443	15	443.9	6.6	1220	300	437	85	0.2	443.9	6.6
LYH210-55	0.56	0.049	0.0713	0.0028	0.0137	0.0013	0.0585	0.0051	445	32	444	17	274	25	450	180	0.2	444	17
LYH210-29	0.559	0.022	0.07135	0.00093	0.0225	0.0018	0.0567	0.0022	448	15	444.2	5.6	449	35	478	83	0.9	444.2	5.6
LYH210-39	0.558	0.028	0.0716	0.0012	0.0401	0.0068	0.0559	0.0029	446	18	446.4	7.3	740	120	420	100	0.1	446.4	7.3
LYH210-88	0.564	0.032	0.0717	0.0014	0.0196	0.0018	0.0574	0.0033	449	21	446.5	8.2	392	35	430	120	0.6	446.5	8.2
LYH210-4	0.561	0.031	0.0718	0.0012	0.062	0.049	0.0558	0.0031	451	20	446.9	7	1050	250	430	110	0.9	446.9	7
LYH210-65	0.553	0.026	0.0718	0.0012	0.0362	0.0056	0.0562	0.0026	446	17	447	7.1	710	100	435	94	0.2	447	7.1
LYH210-79	0.562	0.02	0.07189	0.00093	0.0231	0.0018	0.0558	0.0019	451	13	447.4	5.6	460	36	427	71	0.8	447.4	5.6
LYH210-47	0.56	0.028	0.07188	0.00098	0.041	0.022	0.057	0.0029	451	17	447.9	6	960	220	433	99	0.7	447.9	6
LYH210-36	0.554	0.015	0.07201	0.00082	0.0222	0.0019	0.0556	0.0015	447	10	448.2	4.9	447	38	419	61	0.3	448.2	4.9
LYH210-70	0.558	0.02	0.072	0.001	0.031	0.039	0.0558	0.002	447	13	448.9	5.9	550	390	407	74	0.4	448.9	5.9
LYH210-35	0.558	0.013	0.0722	0.00087	0.0271	0.0027	0.0559	0.0012	449	8.4	449.3	5.2	532	51	442	46	0.1	449.3	5.2
LYH210-13	0.534	0.029	0.0723	0.0013	0.0231	0.0017	0.053	0.0029	432	20	449.7	8	460	34	320	110	3.9	449.7	8
LYH210-32	0.56	0.025	0.0724	0.0011	0.0314	0.0037	0.0561	0.0026	451	16	450.2	6.7	620	72	435	95	0.2	450.2	6.7
LYH210-16	0.55	0.019	0.07256	0.00087	0.041	0.047	0.055	0.002	448	12	451.4	5.2	940	180	405	76	0.8	451.4	5.2
LYH210-34	0.566	0.025	0.0726	0.0011	0.04	0.03	0.0556	0.0023	452	16	451.6	6.7	810	260	407	86	0.1	451.6	6.7
LYH210-28	0.572	0.019	0.073	0.001	0.0207	0.0014	0.0561	0.0018	457	12	455	6.3	413	28	425	70	0.4	455	6.3
LYH210-42	0.573	0.025	0.0732	0.0012	0.0229	0.0021	0.0579	0.0026	457	17	455.2	7	456	40	487	93	0.4	455.2	7
LYH210-12	0.567	0.029	0.0736	0.0015	0.01361	0.00081	0.0564	0.0028	454	18	457.7	9.1	273	16	450	110	0.8	457.7	9.1
LYH210-114	0.57	0.019	0.07355	0.00089	0.0439	0.0064	0.0566	0.0019	457	13	457.8	5.4	850	120	459	71	0.2	457.8	5.4
LYH210-58	0.573	0.018	0.0737	0.0011	0.038	0.045	0.0555	0.0017	458	12	458.4	6.4	820	420	420	67	0.1	458.4	6.4
LYH210-71	0.575	0.036	0.0739	0.0019	0.0162	0.001	0.0575	0.0037	462	23	459	12	324	21	450	130	0.7	459	12
LYH210-24	0.57	0.021	0.07424	0.00087	0.0302	0.0037	0.0556	0.0021	463	14	461.6	5.2	586	69	416	79	0.3	461.6	5.2
LYH210-22	0.584	0.038	0.0745	0.003	0.01239	0.00083	0.0586	0.004	464	24	463	18	249	17	520	150	0.2	463	18
LYH210-85	0.59	0.033	0.0746	0.0014	0.063	0.035	0.0576	0.0034	467	21	463.6	8.4	1090	230	500	120	0.7	463.6	8.4
LYH210-7	0.591	0.038	0.0752	0.0021	0.01338	0.00078	0.0574	0.004	470	24	467	13	271	16	440	140	0.6	467	13
LYH210-11	0.579	0.044	0.0751	0.0025	0.0139	0.00076	0.0568	0.0041	465	28	467	15	279	15	420	150	0.4	467	15
LYH210-2	0.594	0.02	0.07521	0.00087	0.0212	0.0017	0.0567	0.0018	472	13	467.4	5.2	424	33	486	68	1	467.4	5.2
LYH210-68	0.62	0.052	0.0754	0.0017	0.021	0.0022	0.0598	0.005	468	32	469	10	419	43	460	150	0.2	469	10
LYH210-50	0.6	0.028	0.0761	0.0019	0.0222	0.0018	0.0576	0.0027	472	17	473	11	442	35	478	94	0.2	473	11
LYH210-74	0.592	0.029	0.0785	0.0012	0.02	0.0013	0.0555	0.0029	469	18	486.9	7.4	399	26	370	100	3.7	486.9	7.4
LYH210-80	1.214	0.056	0.1344	0.002	0.0434	0.0031	0.0651	0.0028	809	25	812	12	857	60	759	86	0.4	812	12
LYH210-48	1.451	0.038	0.1504	0.0025	0.035	0.0022	0.0699	0.0017	907	16	903	14	695	43	922	47	0.4	903	14
LYH210-72	1.538	0.062	0.1551	0.0023	0.09	0.016	0.0696	0.0023	934	24	930	13	1520	220	906	69	0.4	930	13
LYH210-3	1.708	0.053	0.1697	0.0022	0.0627	0.0061	0.0724	0.0023	1011	20	1011	12	1220	110	995	62	0	1011	12
LYH210-121	2.142	0.065	0.1977	0.0027	0.092	0.011	0.0783	0.0023	1165	20	1165	15	1740	200	1158	58	0	1165	15
LYH210-75	3.42	0.27	0.249	0.014	0.0685	0.0057	0.101	0.0076	1518	61	1462	59	1330	110	1640	130	3.8	1462	59
LYH210-100	4.42	0.16	0.3027	0.0057	0.199	0.032	0.1089	0.0033	1709	31	1705	28	3300	430	1751	56	0.2	1705	28
LYH210-31	4.433	0.088	0.3047	0.003	0.159	0.027	0.105	0.0019	1716	16	1715	15	2650	370	1717	34	0.1	1715	15
LYH210-37	4.48	0.27	0.306	0.013	0.0814	0.0066	0.1076	0.0037	1724	48	1726	63	1580	120	1749	67	0.1	1726	63
LYH210-46	4.597	0.098	0.3114	0.0037	0.25	0.16	0.1075	0.0023	1746	18	1746	18	3290	510	1758	40	0	1746	18
LYH210-45	4.66	0.12	0.3124	0.0041	0.18	0.1	0.1091	0.0028	1754	22	1755	20	2750	380	1774	48	0.1	1755	20
LYH210-62	5.09	0.11	0.3285	0.0033	0.22	0.12	0.1116	0.0024	1831	19	1830	16	2990	430	1821	38	0.1	1830	16
LYH210-19	5	0.21	0.3291	0.007	0.241	0.054	0.1098	0.0049	1830	35	1831	34	3680	550	1783	81	0.1	1831	34
LYH210-61	5.09	0.17	0.3302	0.0046	0.212	0.086	0.11	0.0036	1833	28	1838	22	3830	570	1801	61	0.3	1838	22
LYH210-120	5.348	0.076	0.3362	0.0033	0.18	0.12	0.1144	0.0015	1873	12	1869	16	3570	510	1861	24	0.2	1869	16
LYH210-14	5.58	0.16	0.3458	0.0055	0.166	0.027	0.1172	0.0034	1913	25	1912	26	2730	350	1910	52	0.1	1912	26
LYH210-10	5.58	0.11	0.3453	0.0036	0.167	0.028	0.1174	0.002	1913	18	1913	17	2720	340	1906	31	0	1913	17
LYH210-18	5.6	0.1	0.3457	0.0038	0.23	0.12	0.1178	0.0021	1915	16	1915	18	4040	680	1923	33	0	1915	18
LYH210-118	6.24	0.21	0.3647	0.0076	0.0836	0.0039	0.1257	0.0036	2010	29	2011	36	1620	72	2023	52	0	2011	36
LYH210-57	6.33	0.29	0.3683	0.0067	0.148	0.011	0.1245	0.0049	2017	39	2020	31	2770	180	2008	72	0.1	2020	31
LYH210-119	8.9	0.18	0.4328	0.005	0.159	0.014	0.1488	0.0028	2323	18	2323	22	2930	240	2339	32	0	2323	22
LYH210-17	9.34	0.24	0.4434	0.0057	0.163	0.019	0.1529	0.0038	2370	24	2368	26	2910	290	2388	42	0.1	2368	26
LYH210-30	9.91	0.36	0.451	0.01	0.1206	0.0054	0.1598	0.006	2423	33	2399	45	2341	98	2445	64	1	2399	45
LYH210-59	10.27	0.25	0.4664	0.0084	0.088	0.0044	0.1615	0.003	2466	22	2466	37	1701	81	2472	32	0	2466	37
LYH210-21	10.51	0.24	0.4696	0.006	0.218	0.024	0.1595	0.0037	2478	22	2480	26	3900	380	2446	37	0.1	2480	26
LYH210-44	10.7	0.36	0.4718	0.0076	0.31	0.29	0.163	0.0051	2496	33	2495	34	4680	630	2477	53	0	2495	34
LYH210-20	11.14	0.27	0.4819	0.0064	0.18	0.021	0.1667	0.0039	2533	22	2533	28	3240	330	2520	40	0	2533	28
LYH210-113	11.41	0.26	0.4848	0.0077	0.155	0.012	0.1709	0.0037	2553	21	2548	34	2870	200	2561	37	0.2	2548	34
LYH210-66	11.68	0.55	0.4915	0.0099	0.222	0.018	0.1704	0.0071	2581	43	2581	42	4020	300	2561	71	0	2581	42

## Sheet: Sample7
Analysis	Ratios								Ages								Discordance (%)	Best Age (Ma)
	207Pb/235U		206Pb/238U		208Pb/232Th		207Pb/206Pb		207Pb/235U		206Pb/238U		208Pb/232Th		207Pb/206Pb
		2 s.e.		2 s.e.		2 s.e.		2 s.e.		2 s.e.		2 s.e.		2 s.e.		2 s.e.			2 s.e.
LYH259-7	0.1672	0.0081	0.02528	0.00035	0.00763	0.00054	0.0477	0.0023	157.1	7	160.9	2.2	153	11	102	89	2.4	160.9	2.2
LYH259-14	0.189	0.012	0.02715	0.00088	0.00932	0.00048	0.0509	0.0028	173.3	9.8	172.6	5.5	187.4	9.6	230	100	0.4	172.6	5.5
LYH259-29	0.208	0.025	0.02921	0.00098	0.00941	0.00078	0.0503	0.0058	187	21	185.5	6.1	189	16	220	210	0.8	185.5	6.1
LYH259-9	0.245	0.028	0.03551	0.00097	0.0114	0.0011	0.0499	0.0061	224	22	224.9	6.1	229	22	190	210	0.4	224.9	6.1
LYH259-17	0.24	0.069	0.0355	0.0029	0.0108	0.0013	0.056	0.016	224	60	225	18	216	26	250	540	0.4	225	18
LYH259-105	0.268	0.037	0.0375	0.0029	0.0111	0.0023	0.0514	0.0052	240	29	238	18	223	46	240	210	0.8	238	18
LYH259-108	0.279	0.045	0.0399	0.0013	0.012	0.0014	0.0506	0.0085	253	37	252.4	7.9	242	27	210	300	0.2	252.4	7.9
LYH259-42	0.294	0.015	0.04147	0.0007	0.01256	0.00059	0.0505	0.0025	261	12	261.9	4.3	252	12	239	94	0.3	261.9	4.3
LYH259-23	0.3	0.03	0.04169	0.00084	0.01274	0.00085	0.0511	0.0049	260	23	263.2	5.2	256	17	160	170	1.2	263.2	5.2
LYH259-30	0.296	0.047	0.0425	0.0016	0.0131	0.0011	0.0537	0.009	268	40	268	9.9	262	22	330	340	0	268	9.9
LYH259-35	0.33	0.037	0.0437	0.0013	0.014	0.0013	0.0542	0.0064	276	28	275.7	7.9	280	26	240	210	0.1	275.7	7.9
LYH259-76	0.33	0.15	0.0449	0.0079	0.0161	0.0046	0.053	0.023	280	120	283	49	323	91	260	850	1.1	283	49
LYH259-12	0.343	0.074	0.0464	0.0023	0.0131	0.0029	0.055	0.011	296	59	292	14	263	59	310	400	1.4	292	14
LYH259-72	0.352	0.038	0.047	0.0012	0.014	0.00099	0.054	0.0054	300	28	296.3	7.6	281	20	330	190	1.2	296.3	7.6
LYH259-38	0.364	0.032	0.0502	0.0014	0.0161	0.0022	0.0535	0.005	313	23	315.6	8.6	323	43	290	170	0.8	315.6	8.6
LYH259-77	0.387	0.051	0.0501	0.002	0.0144	0.0014	0.0548	0.0072	320	37	316	12	292	29	290	240	1.3	316	12
LYH259-100	0.4	0.23	0.0504	0.0047	0.0183	0.007	0.058	0.034	320	180	317	29	370	140	300	1200	0.9	317	29
LYH259-73	0.387	0.092	0.0515	0.003	0.0177	0.0038	0.057	0.014	327	71	323	18	354	76	290	450	1.2	323	18
LYH259-1	0.4	0.038	0.0527	0.0012	0.0174	0.0012	0.0546	0.005	335	27	331	7	348	23	290	170	1.2	331	7
LYH259-93	0.422	0.033	0.0577	0.0013	0.018	0.0016	0.0534	0.0043	364	23	361.2	7.9	359	31	270	150	0.8	361.2	7.9
LYH259-102	0.46	0.14	0.061	0.0059	0.0211	0.008	0.055	0.016	379	99	381	36	420	160	330	600	0.5	381	36
LYH259-15	0.494	0.028	0.0639	0.0014	0.021	0.0017	0.0568	0.003	401	19	400.1	8.7	418	34	460	110	0.2	400.1	8.7
LYH259-67	0.515	0.086	0.0668	0.0043	0.0203	0.0051	0.0542	0.0084	419	60	417	26	410	100	350	340	0.5	417	26
LYH259-91	0.533	0.071	0.0675	0.0017	0.0213	0.0024	0.0576	0.0076	425	49	421	10	426	47	430	270	1	421	10
LYH259-28	0.537	0.035	0.0683	0.0013	0.02111	0.00073	0.0571	0.0036	426	23	425.7	7.8	422	15	430	120	0.1	425.7	7.8
LYH259-96	0.536	0.051	0.0689	0.0017	0.021	0.0013	0.056	0.0051	433	35	429	10	420	25	390	180	0.9	429	10
LYH259-53	0.544	0.087	0.0689	0.0027	0.0264	0.0043	0.0583	0.0095	426	57	430	16	524	85	410	310	0.9	430	16
LYH259-13	0.532	0.029	0.0691	0.0012	0.023	0.001	0.0555	0.0033	434	20	431.4	7.2	458	20	390	110	0.6	431.4	7.2
LYH259-6	0.546	0.037	0.0711	0.0011	0.0256	0.0028	0.0547	0.0037	439	24	442.4	6.3	509	55	360	130	0.8	442.4	6.3
LYH259-20	0.544	0.043	0.0714	0.0015	0.0208	0.0013	0.0549	0.0036	445	28	444.5	9.3	416	26	430	140	0.1	444.5	9.3
LYH259-31	0.532	0.042	0.0714	0.0017	0.0219	0.0014	0.054	0.0045	441	28	445	10	437	27	400	160	0.9	445	10
LYH259-92	0.556	0.051	0.0722	0.002	0.0243	0.0018	0.0574	0.0055	451	31	449	12	484	35	450	180	0.4	449	12
LYH259-39	0.58	0.054	0.0727	0.0018	0.0237	0.0017	0.0574	0.0053	451	34	452	11	472	33	400	170	0.2	452	11
LYH259-22	0.593	0.058	0.0738	0.0019	0.0212	0.0012	0.0593	0.0059	457	38	459	12	424	24	350	180	0.4	459	12
LYH259-49	0.6	0.076	0.0747	0.0028	0.0226	0.0024	0.0578	0.0072	466	48	464	17	450	47	530	250	0.4	464	17
LYH259-103	0.61	0.1	0.075	0.0035	0.0241	0.0028	0.06	0.01	466	65	466	21	481	55	440	310	0	466	21
LYH259-58	0.589	0.04	0.0757	0.0014	0.0235	0.0013	0.0564	0.0037	474	26	470.3	8.3	470	25	420	130	0.8	470.3	8.3
LYH259-41	0.61	0.036	0.0762	0.0013	0.0241	0.001	0.0572	0.0032	475	22	472.9	7.8	480	20	460	110	0.4	472.9	7.8
LYH259-86	0.609	0.034	0.0771	0.0018	0.0248	0.0011	0.0593	0.0038	474	21	478	11	494	22	410	110	0.8	478	11
LYH259-97	0.692	0.069	0.0839	0.0024	0.0288	0.0025	0.0599	0.0054	523	40	519	14	574	49	540	190	0.8	519	14
LYH259-89	0.815	0.096	0.0972	0.0029	0.0356	0.0046	0.0607	0.0068	599	54	598	17	706	90	570	240	0.2	598	17
LYH259-114	0.89	0.18	0.1005	0.0046	0.1	0.079	0.063	0.013	618	98	617	27	1220	790	510	400	0.2	617	27
LYH259-37	0.855	0.087	0.1007	0.0029	0.0331	0.0027	0.0624	0.0059	619	48	618	17	656	53	640	190	0.2	618	17
LYH259-110	0.96	0.33	0.107	0.013	0.037	0.0077	0.064	0.018	660	170	657	77	730	150	590	590	0.5	657	77
LYH259-121	1.03	0.18	0.1155	0.0052	0.035	0.012	0.066	0.013	709	88	705	30	700	230	810	410	0.6	705	30
LYH259-83	1.13	0.31	0.125	0.012	0.036	0.015	0.066	0.016	750	160	757	68	710	290	720	550	0.9	757	68
LYH259-119	1.15	0.17	0.1285	0.0067	0.0581	0.0096	0.066	0.01	782	85	779	38	1140	180	690	330	0.4	779	38
LYH259-85	1.217	0.068	0.131	0.0022	0.0438	0.0024	0.067	0.0036	797	31	793	13	865	46	780	110	0.5	793	13
LYH259-50	1.2	0.1	0.1321	0.0038	0.0421	0.0031	0.0656	0.0052	804	48	803	23	832	60	800	170	0.1	803	23
LYH259-112	1.28	0.11	0.1355	0.0033	0.0397	0.0037	0.0672	0.0058	822	51	819	19	785	71	770	190	0.4	819	19
LYH259-32	1.34	0.17	0.1403	0.0042	0.0404	0.0072	0.0701	0.0085	848	76	846	23	790	140	740	250	0.2	846	23
LYH259-120	1.36	0.14	0.1435	0.0048	0.0391	0.003	0.0717	0.008	862	60	864	27	775	58	870	240	0.2	864	27
LYH259-19	1.415	0.093	0.1452	0.0034	0.0433	0.0023	0.0705	0.0042	876	38	874	19	860	45	850	130	0.2	874	19
LYH259-56	1.56	0.32	0.151	0.012	0.056	0.012	0.075	0.016	900	130	905	65	1100	240	770	420	0.6	905	65
LYH259-109	1.49	0.2	0.151	0.0063	0.0423	0.0077	0.0708	0.0094	904	85	906	35	830	150	860	290	0.2	906	35
LYH259-70	1.53	0.25	0.151	0.0057	0.0592	0.0072	0.072	0.011	916	96	913	33	1160	140	820	290	0.3	913	33
LYH259-61	1.46	0.13	0.1534	0.0037	0.0431	0.0041	0.0679	0.0063	923	55	919	21	850	79	840	190	0.4	919	21
LYH259-34	1.47	0.13	0.1528	0.0077	0.0446	0.0033	0.0697	0.0048	921	53	921	42	880	63	930	150	0	921	42
LYH259-27	1.48	0.089	0.1543	0.0031	0.0453	0.0032	0.0704	0.0045	929	37	925	17	894	62	920	130	0.4	925	17
LYH259-79	1.524	0.084	0.1547	0.0025	0.0493	0.0022	0.0718	0.0036	927	35	927	14	971	42	960	100	0	927	14
LYH259-24	1.63	0.087	0.1622	0.0029	0.0529	0.0024	0.0712	0.0034	968	34	970	16	1045	47	930	100	0.2	970	16
LYH259-33	1.659	0.074	0.1654	0.0026	0.0535	0.0023	0.0728	0.0032	991	28	987	15	1050	44	973	91	0.4	987	15
LYH259-2	1.653	0.046	0.1657	0.0022	0.046	0.0039	0.0713	0.0019	986	18	989	12	909	75	958	54	0.3	989	12
LYH259-78	1.7	0.21	0.173	0.0076	0.054	0.011	0.0698	0.0086	1028	95	1028	42	1060	200	940	310	0	1028	42
LYH259-64	1.84	0.38	0.1734	0.0085	0.0515	0.0071	0.076	0.014	1030	130	1030	47	1010	140	930	400	0	1030	47
LYH259-21	1.89	0.55	0.178	0.019	0.051	0.011	0.079	0.026	1050	190	1050	100	1000	210	960	680	0	1050	100
LYH259-47	1.87	0.24	0.178	0.005	0.0692	0.0076	0.0741	0.0089	1055	86	1055	27	1350	140	930	250	0	1055	27
LYH259-18	1.87	0.26	0.1782	0.0078	0.0506	0.0063	0.076	0.01	1063	96	1063	41	1000	120	1030	270	0	1063	41
LYH259-3	1.96	0.23	0.1837	0.0079	0.0651	0.0093	0.077	0.01	1090	81	1087	43	1270	180	1020	280	0.3	1087	43
LYH259-84	1.98	0.19	0.1841	0.0056	0.0584	0.0043	0.0767	0.0069	1086	65	1088	30	1145	81	1010	190	0.2	1088	30
LYH259-48	2.38	0.55	0.206	0.014	0.062	0.014	0.083	0.02	1210	180	1209	77	1210	270	1120	560	0.1	1209	77
LYH259-52	2.7	0.34	0.2302	0.0091	0.0521	0.0052	0.085	0.011	1339	94	1334	48	1025	99	1330	240	0.4	1334	48
LYH259-45	2.82	0.2	0.2354	0.0093	0.0686	0.0063	0.0857	0.0053	1365	56	1362	48	1340	120	1330	120	0.2	1362	48
LYH259-87	2.98	0.29	0.2373	0.0082	0.0597	0.0069	0.0903	0.0078	1373	72	1371	43	1170	130	1480	170	0.1	1371	43
LYH259-90	2.99	0.32	0.2378	0.0087	0.0637	0.0058	0.0897	0.0086	1376	83	1374	45	1240	110	1350	190	0.1	1374	45
LYH259-57	3.08	0.21	0.242	0.01	0.0862	0.0068	0.0917	0.0042	1394	53	1390	52	1670	130	1427	87	0.3	1390	52
LYH259-104	3.5	1.2	0.26	0.014	0.0594	0.0051	0.101	0.035	1490	280	1489	73	1167	97	1440	770	0.1	1489	73
LYH259-8	3.84	0.13	0.2792	0.0031	0.0784	0.0027	0.0979	0.0031	1591	27	1586	16	1523	50	1568	59	0.3	1586	16
LYH259-26	3.95	0.48	0.28	0.01	0.0847	0.0062	0.099	0.01	1593	99	1589	50	1640	110	1610	200	0.3	1589	50
LYH259-106	4.04	0.48	0.2844	0.0095	0.0835	0.0068	0.099	0.01	1611	97	1612	48	1620	130	1610	220	0.1	1612	48
LYH259-82	4.01	0.14	0.2885	0.004	0.0859	0.0029	0.0997	0.0034	1631	29	1633	20	1668	54	1632	64	0.1	1633	20
LYH259-40	4.19	0.42	0.2921	0.0073	0.0889	0.0081	0.1047	0.0096	1650	83	1651	36	1720	150	1630	180	0.1	1651	36
LYH259-68	4.13	0.12	0.293	0.0027	0.0835	0.0039	0.1022	0.0027	1654	23	1657	13	1614	73	1654	50	0.2	1657	13
LYH259-71	4.83	0.97	0.309	0.014	0.087	0.011	0.114	0.02	1740	170	1733	68	1670	200	1730	330	0.4	1733	68
LYH259-44	4.57	0.19	0.3108	0.0062	0.0904	0.0039	0.1077	0.0042	1742	34	1743	31	1747	72	1737	71	0.1	1743	31
LYH259-11	5.29	0.33	0.3346	0.0096	0.0868	0.007	0.1137	0.0069	1855	54	1857	46	1660	130	1780	110	0.1	1857	46
LYH259-25	5.9	1.4	0.348	0.026	0.085	0.022	0.118	0.025	1920	200	1920	120	1640	410	1810	410	0	1920	120
LYH259-115	6.5	1.5	0.368	0.043	0.067	0.03	0.128	0.019	2010	210	2010	200	1310	560	2040	270	0	2010	200
LYH259-88	6.9	0.79	0.383	0.026	0.125	0.015	0.133	0.017	2090	100	2090	120	2390	270	2120	220	0	2090	120
LYH259-95	6.9	0.43	0.3859	0.0082	0.114	0.0068	0.1303	0.0077	2100	57	2101	38	2170	120	2080	100	0	2101	38
LYH259-66	8.1	2	0.405	0.021	0.117	0.016	0.141	0.03	2190	220	2189	95	2240	280	2130	370	0	2189	95
LYH259-10	8.07	0.22	0.4149	0.0071	0.1214	0.0028	0.1402	0.003	2231	25	2233	33	2326	52	2223	37	0.1	2233	33
LYH259-99	10.9	2.8	0.462	0.031	0.112	0.025	0.168	0.041	2450	250	2440	140	2140	460	2400	430	0.4	2440	140
LYH259-74	10.47	0.82	0.465	0.01	0.147	0.016	0.163	0.013	2464	73	2462	44	2770	280	2460	130	0.1	2462	44
LYH259-59	10.71	0.92	0.466	0.017	0.099	0.011	0.169	0.013	2484	78	2482	78	1900	200	2520	130	0.1	2482	78
LYH259-116	11.13	0.9	0.4764	0.0075	0.1388	0.0058	0.17	0.014	2513	75	2511	33	2630	100	2530	140	0.1	2511	33
LYH259-5	11.2	0.45	0.4811	0.0077	0.1363	0.0055	0.1649	0.0066	2531	38	2531	33	2579	99	2487	66	0	2531	33

## Sheet: Sheet1
	100-400		400-550		700-1100		1700-2100		2400-2600
1	28	30.4348	19	20.6522	14	15.2174	20	21.7391	11	11.9565	92
2	21	23.8636	34	38.6364	15	17.0455	14	15.9091	4	4.54545	88
3	18	18.5567	37	38.1443	13	13.4021	25	25.7732	4	4.12371	97
4	65	32.0197	83	40.8867	26	12.8079	21	10.3448	8	3.94089	203
5	31	35.6322	8	9.1954	1	1.14943	28	32.1839	19	21.8391	87
6	33	31.7308	47	45.1923	4	3.84615	14	13.4615	6	5.76923	104
7	21	27.2727	19	24.6753	26	33.7662	6	7.79221	5	6.49351	77

[truncated: 2 more sheets: Sheet3, Sheet6]
